# Supplementary material for: A (2-(naphthalen-2-yl)phenyl)rhodium(i) complex formed by a proposed intramolecular 1,4-ortho-to-ortho′ Rh metal-atom migration and its efficacy as an initiator in the controlled stereospecific polymerisation of phenylacetylene
Source: Royal Society of Chemistry journal article supplement (doi:10.1039/c9dt02953b), 2019-01-01
Supplement: c9dt02953b1.pdf [file c9dt02953b1.pdf]

## SUPPORTING INFORMATION

### A (2-(Naphthalen-2-yl)phenyl)rhodium(I) Complex formed by a Proposed Intramolecular 1,4-Ortho-to-Ortho' Rh Metal-atom Migration and its Efficacy as an Initiator in the Stereospecific Polymerization of Phenylacetylene

Nicholas Sheng Loong Tan, Gareth L. Nealon, Jason M. Lynam, Alexandre N. Sobolev, Matthew R. Rowles, Mark I. Ogden, Massimiliano Massi, and Andrew B. Lowe

#### Computational Data

Collated energies, xyz coordinates and vibration spectra (first 50 lines)

#### III

|                                            |                                                                  |
|--------------------------------------------|------------------------------------------------------------------|
| SCF Energy (au) (RI)BP86/SV(P)             | -2331.1847186240                                                 |
| SCF Energy (au) PBE0/def2-TZVPP            | -2330.873811623                                                  |
| SCF Energy (au) PBE0/def2-TZVPP            | -2330.8903011896 (CH <sub>2</sub> Cl <sub>2</sub><br>correction) |
| Zero Point Energy (au)                     | 0.5814117                                                        |
| Chemical potential (kJ mol <sup>-1</sup> ) | 1325.00                                                          |
| Dispersion correction (au) PBE0/def2-TZVPP | -0.13223627                                                      |

xyz coordinates

77

|    |          |          |          |
|----|----------|----------|----------|
| Rh | 0.80895  | 0.83402  | 0.52686  |
| P  | -0.45035 | 0.00267  | -1.30070 |
| C  | -2.03189 | -0.95567 | -1.11866 |
| C  | -2.09403 | -1.95977 | -0.12520 |
| H  | -1.24533 | -2.10880 | 0.56048  |
| C  | -3.23325 | -2.76528 | 0.01630  |
| H  | -3.28970 | -3.54487 | 0.79129  |
| F  | -5.42352 | -3.32176 | -0.70464 |
| C  | -4.32385 | -2.55652 | -0.83855 |
| C  | -4.29720 | -1.56758 | -1.83051 |
| H  | -5.17221 | -1.43083 | -2.48489 |
| C  | -3.14806 | -0.77221 | -1.96664 |
| H  | -3.13054 | 0.00088  | -2.75090 |
| C  | -0.94811 | 1.40497  | -2.41426 |
| C  | -1.96168 | 2.29842  | -1.99040 |
| H  | -2.50181 | 2.11409  | -1.04730 |
| C  | -2.30422 | 3.42096  | -2.75791 |
| H  | -3.09789 | 4.11506  | -2.44046 |
| F  | -1.93723 | 4.74084  | -4.69412 |
| C  | -1.61445 | 3.66253  | -3.95569 |
| C  | -0.59960 | 2.80571  | -4.39752 |
| H  | -0.07761 | 3.02458  | -5.34194 |
| C  | -0.27356 | 1.67793  | -3.62386 |
| H  | 0.52077  | 1.00201  | -3.97758 |
| C  | 0.50697  | -1.10671 | -2.45390 |
| C  | 1.90991  | -1.20858 | -2.33121 |
| H  | 2.42096  | -0.66014 | -1.52384 |
| C  | 2.65837  | -2.01422 | -3.20516 |

|   |          |          |          |
|---|----------|----------|----------|
| H | 3.75249  | -2.09948 | -3.11594 |
| F | 2.69771  | -3.50740 | -5.04498 |
| C | 1.98896  | -2.73111 | -4.20526 |
| C | 0.59508  | -2.66307 | -4.34666 |
| H | 0.10058  | -3.25084 | -5.13581 |
| C | -0.13788 | -1.85060 | -3.46914 |
| H | -1.23363 | -1.80654 | -3.57581 |
| C | -0.19843 | -0.22830 | 2.00206  |
| C | 1.39036  | 2.34480  | 2.00058  |
| H | 0.69833  | 2.39196  | 2.85494  |
| C | 2.46522  | 1.44795  | 1.83517  |
| H | 2.77218  | 0.64949  | 2.52702  |
| C | 3.37147  | 2.05601  | 0.73663  |
| H | 4.39934  | 1.65240  | 0.67280  |
| C | 3.19470  | 3.57560  | 1.02894  |
| H | 3.61460  | 4.22578  | 0.22798  |
| C | 1.63970  | 3.49894  | 1.00121  |
| H | 1.06513  | 4.42909  | 1.17048  |
| C | 1.41040  | 2.78639  | -0.35568 |
| H | 0.72667  | 3.15657  | -1.13374 |
| C | 2.48916  | 1.90390  | -0.52880 |
| H | 2.83385  | 1.47154  | -1.47927 |
| C | -1.57718 | -1.49049 | 4.20512  |
| C | -0.32817 | -1.92589 | 3.80051  |
| C | 0.37405  | -1.31052 | 2.70943  |
| C | -1.48450 | 0.25952  | 2.45983  |
| C | -2.18568 | -0.37679 | 3.55623  |
| H | -2.10750 | -1.99102 | 5.03301  |
| H | 0.13858  | -2.78765 | 4.30761  |
| C | 1.72632  | -1.86035 | 2.39128  |
| C | -2.10501 | 1.40818  | 1.87226  |
| C | -3.45370 | 0.13077  | 3.97382  |
| C | 4.30196  | -2.93827 | 1.82682  |
| C | 3.94234  | -2.61348 | 3.14653  |
| C | 2.66908  | -2.08860 | 3.42411  |
| C | 2.10560  | -2.19618 | 1.07107  |
| C | 3.37360  | -2.73281 | 0.79153  |
| H | 5.29787  | -3.35815 | 1.60774  |
| H | 4.66071  | -2.76778 | 3.96932  |
| H | 2.40229  | -1.82761 | 4.46215  |
| H | 1.37438  | -2.06969 | 0.25805  |
| H | 3.63157  | -3.00706 | -0.24535 |
| C | -4.02463 | 1.23862  | 3.36224  |
| H | -3.97231 | -0.37363 | 4.80748  |
| C | -3.33587 | 1.88950  | 2.30254  |
| H | -1.54769 | 1.92169  | 1.06809  |
| H | -3.77764 | 2.78218  | 1.82804  |
| H | -5.00162 | 1.62027  | 3.70291  |
| H | 3.59733  | 3.88044  | 2.02184  |

\$vibrational spectrum

| # | mode | symmetry | wave number | IR intensity | selection rules |
|---|------|----------|-------------|--------------|-----------------|
| # |      |          | cm**(-1)    | km/mol       | IR      RAMAN   |
| 1 |      |          | 0.00        | 0.00000      | -      -        |

|    |   |        |         |     |     |
|----|---|--------|---------|-----|-----|
| 2  |   | 0.00   | 0.00000 | -   | -   |
| 3  |   | 0.00   | 0.00000 | -   | -   |
| 4  |   | 0.00   | 0.00000 | -   | -   |
| 5  |   | 0.00   | 0.00000 | -   | -   |
| 6  |   | 0.00   | 0.00000 | -   | -   |
| 7  | a | 7.59   | 0.01209 | YES | YES |
| 8  | a | 15.51  | 0.10037 | YES | YES |
| 9  | a | 25.50  | 0.02614 | YES | YES |
| 10 | a | 27.27  | 0.02920 | YES | YES |
| 11 | a | 32.79  | 0.01369 | YES | YES |
| 12 | a | 34.87  | 0.03667 | YES | YES |
| 13 | a | 39.38  | 0.04786 | YES | YES |
| 14 | a | 41.58  | 0.10366 | YES | YES |
| 15 | a | 49.09  | 0.23461 | YES | YES |
| 16 | a | 52.80  | 0.43652 | YES | YES |
| 17 | a | 54.42  | 0.23562 | YES | YES |
| 18 | a | 58.23  | 0.02264 | YES | YES |
| 19 | a | 65.55  | 0.27902 | YES | YES |
| 20 | a | 68.82  | 0.49504 | YES | YES |
| 21 | a | 77.76  | 0.03226 | YES | YES |
| 22 | a | 80.37  | 0.28320 | YES | YES |
| 23 | a | 95.65  | 0.32940 | YES | YES |
| 24 | a | 121.11 | 0.61179 | YES | YES |
| 25 | a | 127.42 | 1.15150 | YES | YES |
| 26 | a | 137.91 | 0.36472 | YES | YES |
| 27 | a | 146.68 | 1.04575 | YES | YES |
| 28 | a | 158.80 | 1.18253 | YES | YES |
| 29 | a | 162.20 | 0.27064 | YES | YES |
| 30 | a | 173.68 | 0.03100 | YES | YES |
| 31 | a | 192.00 | 1.32467 | YES | YES |
| 32 | a | 200.21 | 0.21556 | YES | YES |
| 33 | a | 210.39 | 0.63678 | YES | YES |
| 34 | a | 224.13 | 1.73590 | YES | YES |
| 35 | a | 232.85 | 0.46567 | YES | YES |
| 36 | a | 250.17 | 0.03803 | YES | YES |
| 37 | a | 262.90 | 0.13928 | YES | YES |
| 38 | a | 278.20 | 3.80460 | YES | YES |
| 39 | a | 292.51 | 7.21763 | YES | YES |
| 40 | a | 305.31 | 1.58583 | YES | YES |
| 41 | a | 310.73 | 0.93240 | YES | YES |
| 42 | a | 324.63 | 0.01535 | YES | YES |
| 43 | a | 340.33 | 0.97565 | YES | YES |
| 44 | a | 366.42 | 0.51061 | YES | YES |
| 45 | a | 398.40 | 5.50234 | YES | YES |
| 46 | a | 399.73 | 1.33988 | YES | YES |
| 47 | a | 403.54 | 5.83863 | YES | YES |
| 48 | a | 406.06 | 0.53744 | YES | YES |
| 49 | a | 406.46 | 0.48951 | YES | YES |
| 50 | a | 411.91 | 0.35641 | YES | YES |

## 4

|                                            |                                                                  |
|--------------------------------------------|------------------------------------------------------------------|
| SCF Energy (au) (RI)BP86/SV(P)             | -2331.1618713660                                                 |
| SCF Energy (au) PBE0/def2-TZVPP            | -2330.846059185                                                  |
| SCF Energy (au) PBE0/def2-TZVPP            | -2330.8647999965 (CH <sub>2</sub> Cl <sub>2</sub><br>correction) |
| Zero Point Energy (au)                     | 0.5800676                                                        |
| Chemical potential (kJ mol <sup>-1</sup> ) | 1332.56                                                          |
| Dispersion correction (au) PBE0/def2-TZVPP | -0.13690915                                                      |

xyz coordinates

77

|    |          |          |          |
|----|----------|----------|----------|
| Rh | -0.30893 | -0.07149 | -1.64389 |
| P  | 0.89611  | -0.23609 | 0.59035  |
| C  | 0.08310  | 1.91245  | -1.92432 |
| C  | -0.90298 | 2.80660  | -1.41223 |
| C  | -0.75299 | 4.19945  | -1.60221 |
| H  | -1.51023 | 4.89716  | -1.20697 |
| C  | 0.34820  | 4.71397  | -2.30583 |
| H  | 0.45017  | 5.80234  | -2.45109 |
| C  | 1.30738  | 3.83515  | -2.83594 |
| H  | 2.16736  | 4.22778  | -3.40525 |
| C  | 1.16693  | 2.44384  | -2.64858 |
| H  | 1.92583  | 1.77815  | -3.09698 |
| C  | 0.30087  | 0.86054  | 1.97481  |
| C  | 0.21922  | 2.24513  | 1.70231  |
| H  | 0.43655  | 2.62475  | 0.69202  |
| C  | -0.12523 | 3.16070  | 2.70620  |
| H  | -0.19280 | 4.23923  | 2.49640  |
| F  | -0.72894 | 3.55934  | 4.96566  |
| C  | -0.39241 | 2.68592  | 3.99698  |
| C  | -0.30757 | 1.32252  | 4.30344  |
| H  | -0.51295 | 0.98211  | 5.33030  |
| C  | 0.04475  | 0.41575  | 3.28994  |
| H  | 0.12686  | -0.65041 | 3.54972  |
| C  | 0.83042  | -1.94099 | 1.32476  |
| C  | -0.38308 | -2.42225 | 1.87383  |
| H  | -1.26516 | -1.76510 | 1.93615  |
| C  | -0.50087 | -3.74431 | 2.32971  |
| H  | -1.44224 | -4.11697 | 2.76258  |
| F  | 0.49607  | -5.87181 | 2.65900  |
| C  | 0.60238  | -4.60286 | 2.22330  |
| C  | 1.81149  | -4.16619 | 1.66735  |
| H  | 2.65825  | -4.86607 | 1.59122  |
| C  | 1.91758  | -2.83823 | 1.22084  |
| H  | 2.87179  | -2.50366 | 0.78457  |
| C  | 2.70991  | 0.18551  | 0.72318  |
| C  | 3.34113  | 0.92705  | -0.29566 |
| H  | 2.76814  | 1.22789  | -1.18447 |
| C  | 4.68134  | 1.33347  | -0.17570 |
| H  | 5.17662  | 1.91937  | -0.96533 |
| F  | 6.67723  | 1.36762  | 1.10342  |
| C  | 5.39129  | 0.99054  | 0.98036  |
| C  | 4.78791  | 0.27033  | 2.02305  |

|   |          |          |          |
|---|----------|----------|----------|
| H | 5.37041  | 0.03454  | 2.92736  |
| C | 3.44788  | -0.11867 | 1.89235  |
| H | 2.97082  | -0.66278 | 2.72359  |
| C | -2.02231 | 2.15345  | -0.71658 |
| C | -1.97909 | 0.74074  | -0.66912 |
| H | -1.34127 | 0.35343  | -2.76567 |
| C | -3.06701 | 0.04337  | -0.03408 |
| C | -3.14875 | -1.38302 | 0.05007  |
| H | -2.33593 | -1.97676 | -0.38440 |
| C | -4.21418 | -2.03378 | 0.66260  |
| H | -4.23712 | -3.13629 | 0.69555  |
| C | -5.27480 | -1.28639 | 1.24102  |
| H | -6.11909 | -1.80479 | 1.72527  |
| C | -5.23881 | 0.10061  | 1.18755  |
| H | -6.05536 | 0.69553  | 1.63229  |
| C | -4.16132 | 0.79533  | 0.56061  |
| C | -4.14265 | 2.21967  | 0.50084  |
| H | -4.97447 | 2.78527  | 0.95379  |
| C | -3.10029 | 2.87868  | -0.12349 |
| H | -3.10727 | 3.98025  | -0.16727 |
| C | 0.64188  | -0.68403 | -3.58881 |
| H | 0.76395  | 0.19744  | -4.23391 |
| C | 1.51924  | -1.13673 | -2.59487 |
| H | 2.47896  | -0.69076 | -2.30296 |
| C | 1.14058  | -2.61776 | -2.33959 |
| H | 1.88500  | -3.22491 | -1.79269 |
| C | 0.74743  | -3.06194 | -3.77933 |
| H | 0.26582  | -4.06515 | -3.81331 |
| H | 1.59695  | -3.01933 | -4.49735 |
| C | -0.25992 | -1.89006 | -3.95487 |
| H | -0.81709 | -1.80486 | -4.90657 |
| C | -1.11486 | -2.05828 | -2.67905 |
| H | -2.21294 | -2.02539 | -2.65707 |
| C | -0.25703 | -2.51440 | -1.69215 |
| H | -0.51589 | -2.92048 | -0.70682 |

\$vibrational spectrum

| # | mode | symmetry | wave number<br>cm** (-1) | IR intensity<br>km/mol | selection rules |       |
|---|------|----------|--------------------------|------------------------|-----------------|-------|
| # |      |          |                          |                        | IR              | RAMAN |
|   | 1    |          | 0.00                     | 0.00000                | -               | -     |
|   | 2    |          | 0.00                     | 0.00000                | -               | -     |
|   | 3    |          | 0.00                     | 0.00000                | -               | -     |
|   | 4    |          | 0.00                     | 0.00000                | -               | -     |
|   | 5    |          | 0.00                     | 0.00000                | -               | -     |
|   | 6    |          | 0.00                     | 0.00000                | -               | -     |
|   | 7    | a        | 10.55                    | 0.04403                | YES             | YES   |
|   | 8    | a        | 18.58                    | 0.05320                | YES             | YES   |
|   | 9    | a        | 30.45                    | 0.01542                | YES             | YES   |
|   | 10   | a        | 30.99                    | 0.01683                | YES             | YES   |
|   | 11   | a        | 38.03                    | 0.00569                | YES             | YES   |
|   | 12   | a        | 40.22                    | 0.15903                | YES             | YES   |
|   | 13   | a        | 49.51                    | 0.40306                | YES             | YES   |
|   | 14   | a        | 55.99                    | 0.29201                | YES             | YES   |
|   | 15   | a        | 63.07                    | 0.17025                | YES             | YES   |

|    |   |        |         |     |     |
|----|---|--------|---------|-----|-----|
| 16 | a | 66.68  | 0.10446 | YES | YES |
| 17 | a | 78.02  | 0.79650 | YES | YES |
| 18 | a | 79.34  | 0.29531 | YES | YES |
| 19 | a | 84.45  | 0.07874 | YES | YES |
| 20 | a | 101.93 | 0.95669 | YES | YES |
| 21 | a | 106.30 | 0.51204 | YES | YES |
| 22 | a | 122.15 | 1.65858 | YES | YES |
| 23 | a | 133.34 | 0.15592 | YES | YES |
| 24 | a | 135.19 | 0.12812 | YES | YES |
| 25 | a | 142.26 | 0.17421 | YES | YES |
| 26 | a | 156.79 | 0.24230 | YES | YES |
| 27 | a | 160.57 | 0.36840 | YES | YES |
| 28 | a | 165.02 | 0.16904 | YES | YES |
| 29 | a | 171.23 | 0.05847 | YES | YES |
| 30 | a | 192.90 | 0.26351 | YES | YES |
| 31 | a | 201.34 | 0.13707 | YES | YES |
| 32 | a | 210.94 | 0.26278 | YES | YES |
| 33 | a | 214.29 | 1.74860 | YES | YES |
| 34 | a | 218.13 | 4.38416 | YES | YES |
| 35 | a | 239.05 | 0.38190 | YES | YES |
| 36 | a | 239.45 | 0.61185 | YES | YES |
| 37 | a | 267.94 | 1.01674 | YES | YES |
| 38 | a | 285.86 | 0.84789 | YES | YES |
| 39 | a | 299.92 | 0.20019 | YES | YES |
| 40 | a | 316.53 | 0.04625 | YES | YES |
| 41 | a | 318.10 | 0.04192 | YES | YES |
| 42 | a | 319.28 | 1.05410 | YES | YES |
| 43 | a | 352.17 | 0.49971 | YES | YES |
| 44 | a | 368.18 | 1.95701 | YES | YES |
| 45 | a | 396.32 | 2.24848 | YES | YES |
| 46 | a | 397.94 | 2.59516 | YES | YES |
| 47 | a | 403.45 | 7.31311 | YES | YES |
| 48 | a | 407.32 | 3.78763 | YES | YES |
| 49 | a | 411.46 | 0.14305 | YES | YES |
| 50 | a | 417.33 | 3.23181 | YES | YES |

**2a**

|                                            |                                                                  |
|--------------------------------------------|------------------------------------------------------------------|
| SCF Energy (au) (RI)BP86/SV(P)             | -2331.1924404700                                                 |
| SCF Energy (au) PBE0/def2-TZVPP            | -2330.880845609                                                  |
| SCF Energy (au) PBE0/def2-TZVPP            | -2330.8967247921 (CH <sub>2</sub> Cl <sub>2</sub><br>correction) |
| Zero Point Energy (au)                     | 0.5815712                                                        |
| Chemical potential (kJ mol <sup>-1</sup> ) | 1331.40                                                          |
| Dispersion correction (au) PBE0/def2-TZVPP | -0.13426295                                                      |

xyz coordinates

77

|    |          |          |          |
|----|----------|----------|----------|
| Rh | 1.30297  | 0.43913  | 0.89333  |
| P  | 0.41265  | -0.79658 | -0.89504 |
| C  | 0.51706  | -0.87398 | 2.25772  |
| C  | -0.82204 | -0.71610 | 2.74605  |
| C  | -1.31250 | -1.58563 | 3.75457  |
| H  | -2.32723 | -1.42678 | 4.15782  |
| C  | -0.53082 | -2.62628 | 4.27115  |
| H  | -0.93316 | -3.28386 | 5.05978  |
| C  | 0.77004  | -2.81540 | 3.77291  |
| H  | 1.39774  | -3.64005 | 4.15339  |
| C  | 1.27646  | -1.94513 | 2.79191  |
| H  | 2.29804  | -2.12783 | 2.41824  |
| C  | -1.26825 | -1.58120 | -0.80024 |
| C  | -1.45857 | -2.62985 | 0.13151  |
| H  | -0.62083 | -2.97243 | 0.75933  |
| C  | -2.70833 | -3.24980 | 0.27084  |
| H  | -2.86455 | -4.06610 | 0.99265  |
| F  | -4.98429 | -3.39422 | -0.38210 |
| C  | -3.77796 | -2.80884 | -0.52083 |
| C  | -3.62156 | -1.77606 | -1.45285 |
| H  | -4.48149 | -1.45879 | -2.06292 |
| C  | -2.36305 | -1.16691 | -1.58828 |
| H  | -2.24249 | -0.35963 | -2.32680 |
| C  | 0.32003  | 0.21013  | -2.45357 |
| C  | -0.33968 | 1.46129  | -2.38713 |
| H  | -0.80407 | 1.78881  | -1.44087 |
| C  | -0.41482 | 2.30123  | -3.50838 |
| H  | -0.93397 | 3.27122  | -3.46544 |
| F  | 0.15095  | 2.70215  | -5.77725 |
| C  | 0.20115  | 1.89468  | -4.70109 |
| C  | 0.87479  | 0.67075  | -4.79609 |
| H  | 1.35139  | 0.38689  | -5.74740 |
| C  | 0.92637  | -0.16894 | -3.67072 |
| H  | 1.45576  | -1.13134 | -3.74876 |
| C  | 1.44803  | -2.25853 | -1.38425 |
| C  | 2.76442  | -2.36535 | -0.88904 |
| H  | 3.13337  | -1.58490 | -0.20192 |
| C  | 3.58378  | -3.45001 | -1.24076 |
| H  | 4.61131  | -3.54767 | -0.85707 |
| F  | 3.84080  | -5.48665 | -2.42672 |
| C  | 3.06795  | -4.43734 | -2.09068 |
| C  | 1.76092  | -4.36515 | -2.59480 |

|   |          |          |          |
|---|----------|----------|----------|
| H | 1.38952  | -5.16564 | -3.25356 |
| C | 0.95540  | -3.27432 | -2.23605 |
| H | -0.07627 | -3.22169 | -2.62096 |
| C | -1.72647 | 0.32386  | 2.18807  |
| C | -1.24192 | 1.56245  | 1.74798  |
| H | -0.17042 | 1.81131  | 1.91514  |
| C | -2.09452 | 2.56081  | 1.18419  |
| C | -1.60797 | 3.83636  | 0.76084  |
| H | -0.53509 | 4.06118  | 0.88273  |
| C | -2.46521 | 4.78689  | 0.21835  |
| H | -2.07166 | 5.76705  | -0.09873 |
| C | -3.85302 | 4.50566  | 0.07815  |
| H | -4.52561 | 5.26640  | -0.35153 |
| C | -4.36024 | 3.27951  | 0.49201  |
| H | -5.43746 | 3.06061  | 0.39513  |
| C | -3.50659 | 2.28499  | 1.05510  |
| C | -3.99030 | 1.02118  | 1.51224  |
| H | -5.06563 | 0.79573  | 1.41138  |
| C | -3.13499 | 0.08048  | 2.06205  |
| H | -3.53845 | -0.89492 | 2.37602  |
| C | 2.46835  | 1.58464  | 2.33760  |
| H | 2.06852  | 1.60720  | 3.36276  |
| C | 3.27808  | 0.55636  | 1.78166  |
| H | 3.62015  | -0.34850 | 2.30856  |
| C | 4.03597  | 1.20244  | 0.59640  |
| H | 4.92535  | 0.66001  | 0.22228  |
| C | 4.23367  | 2.65426  | 1.12103  |
| H | 4.59566  | 3.35570  | 0.33495  |
| H | 4.89187  | 2.70843  | 2.01776  |
| C | 2.72661  | 2.83935  | 1.46256  |
| H | 2.40682  | 3.81035  | 1.88645  |
| C | 2.07507  | 2.42561  | 0.11635  |
| H | 1.30665  | 3.00117  | -0.42028 |
| C | 2.88212  | 1.41446  | -0.41440 |
| H | 2.88572  | 1.05163  | -1.45243 |

\$vibrational spectrum

| # | mode | symmetry | wave number<br>cm** (-1) | IR intensity<br>km/mol | selection rules |       |
|---|------|----------|--------------------------|------------------------|-----------------|-------|
| # |      |          |                          |                        | IR              | RAMAN |
|   | 1    |          | 0.00                     | 0.00000                | -               | -     |
|   | 2    |          | 0.00                     | 0.00000                | -               | -     |
|   | 3    |          | 0.00                     | 0.00000                | -               | -     |
|   | 4    |          | 0.00                     | 0.00000                | -               | -     |
|   | 5    |          | 0.00                     | 0.00000                | -               | -     |
|   | 6    |          | 0.00                     | 0.00000                | -               | -     |
|   | 7    | a        | 11.78                    | 0.01182                | YES             | YES   |
|   | 8    | a        | 19.57                    | 0.01533                | YES             | YES   |
|   | 9    | a        | 29.91                    | 0.03569                | YES             | YES   |
|   | 10   | a        | 30.37                    | 0.16710                | YES             | YES   |
|   | 11   | a        | 36.52                    | 0.29347                | YES             | YES   |
|   | 12   | a        | 40.07                    | 0.00261                | YES             | YES   |
|   | 13   | a        | 44.31                    | 0.08638                | YES             | YES   |
|   | 14   | a        | 48.63                    | 0.24262                | YES             | YES   |
|   | 15   | a        | 51.88                    | 0.03614                | YES             | YES   |



|    |   |        |         |     |     |
|----|---|--------|---------|-----|-----|
| 16 | a | 54.30  | 0.14651 | YES | YES |
| 17 | a | 60.78  | 0.32739 | YES | YES |
| 18 | a | 62.05  | 0.05873 | YES | YES |
| 19 | a | 73.33  | 0.35399 | YES | YES |
| 20 | a | 77.00  | 0.00591 | YES | YES |
| 21 | a | 86.12  | 0.30008 | YES | YES |
| 22 | a | 88.44  | 1.31380 | YES | YES |
| 23 | a | 104.85 | 0.96340 | YES | YES |
| 24 | a | 123.56 | 0.97988 | YES | YES |
| 25 | a | 137.87 | 0.23305 | YES | YES |
| 26 | a | 151.64 | 0.17912 | YES | YES |
| 27 | a | 155.69 | 1.10374 | YES | YES |
| 28 | a | 160.84 | 0.46585 | YES | YES |
| 29 | a | 170.92 | 0.30726 | YES | YES |
| 30 | a | 186.84 | 0.78800 | YES | YES |
| 31 | a | 201.26 | 0.31674 | YES | YES |
| 32 | a | 203.43 | 1.21223 | YES | YES |
| 33 | a | 210.47 | 1.31349 | YES | YES |
| 34 | a | 211.43 | 0.05901 | YES | YES |
| 35 | a | 233.37 | 0.22769 | YES | YES |
| 36 | a | 261.44 | 3.07324 | YES | YES |
| 37 | a | 272.12 | 0.96851 | YES | YES |
| 38 | a | 282.51 | 3.81238 | YES | YES |
| 39 | a | 306.87 | 0.59142 | YES | YES |
| 40 | a | 310.59 | 0.09792 | YES | YES |
| 41 | a | 323.50 | 3.71623 | YES | YES |
| 42 | a | 330.05 | 0.16333 | YES | YES |
| 43 | a | 339.83 | 0.69971 | YES | YES |
| 44 | a | 350.33 | 0.71071 | YES | YES |
| 45 | a | 394.11 | 1.07059 | YES | YES |
| 46 | a | 398.21 | 2.14857 | YES | YES |
| 47 | a | 401.35 | 3.89191 | YES | YES |
| 48 | a | 406.62 | 0.69484 | YES | YES |
| 49 | a | 409.25 | 2.76926 | YES | YES |
| 50 | a | 410.22 | 0.20267 | YES | YES |

**2a'**

|                                            |                                                                  |
|--------------------------------------------|------------------------------------------------------------------|
| SCF Energy (au) (RI)BP86/SV(P)             | -2331.1914399000                                                 |
| SCF Energy (au) PBE0/def2-TZVPP            | -2330.879607762                                                  |
| SCF Energy (au) PBE0/def2-TZVPP            | -2330.8959858261 (CH <sub>2</sub> Cl <sub>2</sub><br>correction) |
| Zero Point Energy (au)                     | 0.5810835                                                        |
| Chemical potential (kJ mol <sup>-1</sup> ) | 1327.23                                                          |
| Dispersion correction (au) PBE0/def2-TZVPP | -0.13294019                                                      |

xyz coordinates

77

|    |          |          |          |
|----|----------|----------|----------|
| Rh | 1.51317  | 0.60041  | 0.84408  |
| P  | 0.62701  | -0.63559 | -0.94787 |
| C  | 0.72450  | -0.72614 | 2.19761  |
| C  | -0.60689 | -0.55861 | 2.70390  |
| C  | -1.09105 | -1.43063 | 3.71281  |
| H  | -2.09596 | -1.25811 | 4.13438  |
| C  | -0.31638 | -2.48938 | 4.20369  |
| H  | -0.71483 | -3.14941 | 4.99215  |
| C  | 0.97387  | -2.69031 | 3.68354  |
| H  | 1.59755  | -3.52598 | 4.04582  |
| C  | 1.47747  | -1.81373 | 2.70614  |
| H  | 2.49233  | -2.00242 | 2.31699  |
| C  | -1.05503 | -1.41931 | -0.84276 |
| C  | -1.23783 | -2.47531 | 0.08219  |
| H  | -0.39364 | -2.82929 | 0.69464  |
| C  | -2.48988 | -3.08684 | 0.23767  |
| H  | -2.64017 | -3.90754 | 0.95588  |
| F  | -4.77845 | -3.20977 | -0.37706 |
| C  | -3.57011 | -2.63095 | -0.53073 |
| C  | -3.42184 | -1.59018 | -1.45496 |
| H  | -4.29049 | -1.25804 | -2.04415 |
| C  | -2.16096 | -0.98957 | -1.60667 |
| H  | -2.04953 | -0.17538 | -2.33913 |
| C  | 0.53262  | 0.36665  | -2.51143 |
| C  | -0.14007 | 1.61129  | -2.45296 |
| H  | -0.61198 | 1.93317  | -1.50834 |
| C  | -0.21920 | 2.44697  | -3.57727 |
| H  | -0.74885 | 3.41181  | -3.54345 |
| F  | 0.34612  | 2.84572  | -5.84639 |
| C  | 0.40547  | 2.04348  | -4.76654 |
| C  | 1.09580  | 0.82823  | -4.85261 |
| H  | 1.58162  | 0.54729  | -5.80010 |
| C  | 1.15111  | -0.00750 | -3.72410 |
| H  | 1.69304  | -0.96341 | -3.79669 |
| C  | 1.66403  | -2.09749 | -1.43566 |
| C  | 2.98301  | -2.19911 | -0.94614 |
| H  | 3.35271  | -1.41649 | -0.26204 |
| C  | 3.80568  | -3.28069 | -1.30002 |
| H  | 4.83506  | -3.37414 | -0.92030 |
| F  | 4.06844  | -5.31598 | -2.48748 |
| C  | 3.29098  | -4.27093 | -2.14720 |

|   |          |          |          |
|---|----------|----------|----------|
| C | 1.98069  | -4.20476 | -2.64407 |
| H | 1.60929  | -5.00793 | -3.29953 |
| C | 1.17192  | -3.11651 | -2.28363 |
| H | 0.13891  | -3.06790 | -2.66476 |
| C | -1.51159 | 0.49288  | 2.16331  |
| C | -2.89185 | 0.29244  | 2.04788  |
| H | -3.33039 | -0.67306 | 2.34866  |
| C | -3.76368 | 1.28108  | 1.50686  |
| C | -5.17169 | 1.06653  | 1.38264  |
| H | -5.59185 | 0.10266  | 1.71664  |
| C | -5.99989 | 2.04772  | 0.85394  |
| H | -7.08440 | 1.86686  | 0.76847  |
| C | -5.45676 | 3.29138  | 0.42167  |
| H | -6.12451 | 4.06471  | 0.00684  |
| C | -4.09193 | 3.52980  | 0.52184  |
| H | -3.66786 | 4.49254  | 0.18800  |
| C | -3.21337 | 2.54024  | 1.05786  |
| C | -1.80573 | 2.73788  | 1.18012  |
| H | -1.37387 | 3.70470  | 0.86817  |
| C | -0.98877 | 1.75118  | 1.71679  |
| H | 0.09352  | 1.95838  | 1.87422  |
| C | 2.68535  | 1.72137  | 2.30480  |
| H | 2.29403  | 1.72327  | 3.33378  |
| C | 3.49231  | 0.70577  | 1.72241  |
| H | 3.83862  | -0.20882 | 2.22907  |
| C | 4.24035  | 1.37679  | 0.54428  |
| H | 5.12806  | 0.84370  | 0.15368  |
| C | 4.43913  | 2.81847  | 1.09653  |
| H | 4.79383  | 3.53551  | 0.32138  |
| H | 5.10387  | 2.85704  | 1.98916  |
| C | 2.93425  | 2.99360  | 1.45230  |
| H | 2.61459  | 3.95535  | 1.89693  |
| C | 2.27494  | 2.60580  | 0.10211  |
| H | 1.49901  | 3.19165  | -0.41269 |
| C | 3.08024  | 1.60802  | -0.45520 |
| H | 3.07677  | 1.26489  | -1.49989 |

\$vibrational spectrum

| # | mode | symmetry | wave number<br>cm**(-1) | IR intensity<br>km/mol | selection rules |       |
|---|------|----------|-------------------------|------------------------|-----------------|-------|
| # |      |          |                         |                        | IR              | RAMAN |
|   | 1    |          | 0.00                    | 0.00000                | -               | -     |
|   | 2    |          | 0.00                    | 0.00000                | -               | -     |
|   | 3    |          | 0.00                    | 0.00000                | -               | -     |
|   | 4    |          | 0.00                    | 0.00000                | -               | -     |
|   | 5    |          | 0.00                    | 0.00000                | -               | -     |
|   | 6    |          | 0.00                    | 0.00000                | -               | -     |
|   | 7    | a        | 10.43                   | 0.00249                | YES             | YES   |
|   | 8    | a        | 19.43                   | 0.02394                | YES             | YES   |
|   | 9    | a        | 23.18                   | 0.09970                | YES             | YES   |
|   | 10   | a        | 28.45                   | 0.10250                | YES             | YES   |
|   | 11   | a        | 33.45                   | 0.03196                | YES             | YES   |
|   | 12   | a        | 36.54                   | 0.08041                | YES             | YES   |
|   | 13   | a        | 42.05                   | 0.50250                | YES             | YES   |
|   | 14   | a        | 44.73                   | 0.66980                | YES             | YES   |

|    |   |        |         |     |     |
|----|---|--------|---------|-----|-----|
| 15 | a | 50.42  | 0.19608 | YES | YES |
| 16 | a | 54.18  | 0.14253 | YES | YES |
| 17 | a | 58.54  | 0.17859 | YES | YES |
| 18 | a | 59.70  | 0.06530 | YES | YES |
| 19 | a | 65.01  | 0.42829 | YES | YES |
| 20 | a | 72.81  | 0.03556 | YES | YES |
| 21 | a | 82.61  | 0.47344 | YES | YES |
| 22 | a | 88.88  | 0.98953 | YES | YES |
| 23 | a | 103.07 | 0.91777 | YES | YES |
| 24 | a | 119.75 | 0.75562 | YES | YES |
| 25 | a | 135.46 | 0.26566 | YES | YES |
| 26 | a | 148.32 | 0.02437 | YES | YES |
| 27 | a | 150.56 | 0.60056 | YES | YES |
| 28 | a | 158.62 | 0.27074 | YES | YES |
| 29 | a | 171.38 | 0.84570 | YES | YES |
| 30 | a | 191.16 | 0.67494 | YES | YES |
| 31 | a | 196.83 | 0.69917 | YES | YES |
| 32 | a | 201.66 | 0.30481 | YES | YES |
| 33 | a | 208.50 | 0.91739 | YES | YES |
| 34 | a | 211.09 | 0.55877 | YES | YES |
| 35 | a | 233.27 | 0.20356 | YES | YES |
| 36 | a | 260.37 | 2.35036 | YES | YES |
| 37 | a | 269.22 | 1.06363 | YES | YES |
| 38 | a | 281.65 | 4.22651 | YES | YES |
| 39 | a | 307.00 | 1.20281 | YES | YES |
| 40 | a | 309.64 | 0.28756 | YES | YES |
| 41 | a | 322.43 | 3.32278 | YES | YES |
| 42 | a | 328.20 | 0.17722 | YES | YES |
| 43 | a | 338.08 | 0.90103 | YES | YES |
| 44 | a | 350.23 | 1.20900 | YES | YES |
| 45 | a | 392.44 | 0.09549 | YES | YES |
| 46 | a | 397.30 | 1.83315 | YES | YES |
| 47 | a | 400.97 | 4.10121 | YES | YES |
| 48 | a | 406.25 | 1.46646 | YES | YES |
| 49 | a | 407.50 | 2.42241 | YES | YES |
| 50 | a | 409.29 | 0.21562 | YES | YES |

## 5

|                                            |                                                                  |
|--------------------------------------------|------------------------------------------------------------------|
| SCF Energy (au) (RI)BP86/SV(P)             | -2331.1698859460                                                 |
| SCF Energy (au) PBE0/def2-TZVPP            | -2330.853715041                                                  |
| SCF Energy (au) PBE0/def2-TZVPP            | -2330.8730013566 (CH <sub>2</sub> Cl <sub>2</sub><br>correction) |
| Zero Point Energy (au)                     | 0.5796976                                                        |
| Chemical potential (kJ mol <sup>-1</sup> ) | 1330.45                                                          |
| Dispersion correction (au) PBE0/def2-TZVPP | -0.13517272                                                      |

xyz coordinates

77

|    |          |          |          |
|----|----------|----------|----------|
| Rh | -0.11225 | -0.25936 | -1.76763 |
| P  | 1.05975  | -0.39595 | 0.45553  |
| C  | 0.23558  | 1.76623  | -1.87019 |
| C  | -0.76350 | 2.58079  | -1.25301 |
| C  | -0.64651 | 3.98834  | -1.29114 |
| H  | -1.41679 | 4.61914  | -0.81602 |
| C  | 0.44005  | 4.59873  | -1.93670 |
| H  | 0.52027  | 5.69838  | -1.96194 |
| C  | 1.41531  | 3.80318  | -2.56547 |
| H  | 2.26337  | 4.27668  | -3.08956 |
| C  | 1.30253  | 2.39797  | -2.53682 |
| H  | 2.06665  | 1.79614  | -3.06141 |
| C  | 0.54790  | 0.86665  | 1.72874  |
| C  | 0.88451  | 2.21379  | 1.45569  |
| H  | 1.40392  | 2.47955  | 0.52234  |
| C  | 0.57937  | 3.23443  | 2.36642  |
| H  | 0.83806  | 4.28315  | 2.15460  |
| F  | -0.36845 | 3.88262  | 4.44217  |
| C  | -0.07018 | 2.90591  | 3.56354  |
| C  | -0.40360 | 1.58179  | 3.87083  |
| H  | -0.90284 | 1.35343  | 4.82520  |
| C  | -0.08986 | 0.56748  | 2.95109  |
| H  | -0.33921 | -0.46959 | 3.21825  |
| C  | 0.80801  | -2.03143 | 1.29448  |
| C  | -0.49410 | -2.39585 | 1.72009  |
| H  | -1.33010 | -1.68651 | 1.60922  |
| C  | -0.75537 | -3.66602 | 2.25640  |
| H  | -1.76400 | -3.94729 | 2.59705  |
| F  | 0.04723  | -5.81434 | 2.86331  |
| C  | 0.29093  | -4.59463 | 2.34937  |
| C  | 1.58159  | -4.28043 | 1.90650  |
| H  | 2.37916  | -5.03633 | 1.97833  |
| C  | 1.83209  | -3.00160 | 1.38091  |
| H  | 2.84916  | -2.76750 | 1.03018  |
| C  | 2.89925  | -0.12200 | 0.59262  |
| C  | 3.61374  | 0.45877  | -0.47488 |
| H  | 3.08656  | 0.71778  | -1.40453 |
| C  | 4.98153  | 0.76096  | -0.35710 |
| H  | 5.54255  | 1.22094  | -1.18520 |
| F  | 6.94576  | 0.75435  | 0.96953  |
| C  | 5.63499  | 0.47694  | 0.84739  |

|   |          |          |          |
|---|----------|----------|----------|
| C | 4.94935  | -0.07852 | 1.93894  |
| H | 5.48980  | -0.26734 | 2.87964  |
| C | 3.58339  | -0.36340 | 1.80864  |
| H | 3.04116  | -0.77118 | 2.67715  |
| C | -1.86919 | 1.83476  | -0.62858 |
| C | -1.77155 | 0.39917  | -0.77102 |
| H | -1.03766 | 0.28425  | -2.93472 |
| C | -2.79264 | -0.40345 | -0.27860 |
| C | -4.97848 | -0.66138 | 0.92476  |
| C | -3.92434 | 0.14872  | 0.40596  |
| C | -4.00177 | 1.58225  | 0.57448  |
| C | -5.12654 | 2.13429  | 1.26035  |
| C | -2.95898 | 2.39342  | 0.03896  |
| H | -3.03964 | 3.48741  | 0.16050  |
| C | 0.88539  | -0.95685 | -3.71889 |
| H | 1.09596  | -0.08506 | -4.35482 |
| C | 1.68598  | -1.48069 | -2.70567 |
| H | 2.66701  | -1.11797 | -2.37543 |
| C | 1.13312  | -2.89373 | -2.40085 |
| H | 1.79917  | -3.56399 | -1.82650 |
| C | 0.70021  | -3.33661 | -3.82966 |
| H | 0.09678  | -4.27202 | -3.83276 |
| H | 1.55380  | -3.42760 | -4.53855 |
| C | -0.15318 | -2.05695 | -4.06013 |
| H | -0.68550 | -1.93912 | -5.02260 |
| C | -1.03964 | -2.07679 | -2.78939 |
| H | -2.13367 | -1.96729 | -2.79547 |
| C | -0.24888 | -2.59969 | -1.76738 |
| H | -0.58687 | -2.98388 | -0.79684 |
| H | -2.76218 | -1.50063 | -0.40928 |
| H | -5.18297 | 3.22912  | 1.38801  |
| C | -6.13474 | 1.31772  | 1.75840  |
| H | -6.99621 | 1.76117  | 2.28503  |
| C | -6.06061 | -0.09293 | 1.58777  |
| H | -6.86637 | -0.73489 | 1.98176  |
| H | -4.92256 | -1.75563 | 0.78858  |

\$vibrational spectrum

| # | mode | symmetry | wave number<br>cm**(-1) | IR intensity<br>km/mol | selection rules |       |
|---|------|----------|-------------------------|------------------------|-----------------|-------|
| # |      |          |                         |                        | IR              | RAMAN |
|   | 1    |          | 0.00                    | 0.00000                | -               | -     |
|   | 2    |          | 0.00                    | 0.00000                | -               | -     |
|   | 3    |          | 0.00                    | 0.00000                | -               | -     |
|   | 4    |          | 0.00                    | 0.00000                | -               | -     |
|   | 5    |          | 0.00                    | 0.00000                | -               | -     |
|   | 6    |          | 0.00                    | 0.00000                | -               | -     |
|   | 7    | a        | 9.63                    | 0.01233                | YES             | YES   |
|   | 8    | a        | 19.68                   | 0.05651                | YES             | YES   |
|   | 9    | a        | 24.56                   | 0.06716                | YES             | YES   |
|   | 10   | a        | 32.85                   | 0.02256                | YES             | YES   |
|   | 11   | a        | 36.84                   | 0.00171                | YES             | YES   |
|   | 12   | a        | 39.35                   | 0.07561                | YES             | YES   |
|   | 13   | a        | 48.83                   | 0.44338                | YES             | YES   |
|   | 14   | a        | 56.99                   | 0.36500                | YES             | YES   |

|    |   |        |         |     |     |
|----|---|--------|---------|-----|-----|
| 15 | a | 58.93  | 0.11007 | YES | YES |
| 16 | a | 66.18  | 0.10898 | YES | YES |
| 17 | a | 68.28  | 0.18551 | YES | YES |
| 18 | a | 79.55  | 1.12346 | YES | YES |
| 19 | a | 84.59  | 0.10159 | YES | YES |
| 20 | a | 101.32 | 1.31266 | YES | YES |
| 21 | a | 105.25 | 0.23827 | YES | YES |
| 22 | a | 113.40 | 0.40164 | YES | YES |
| 23 | a | 126.68 | 1.11594 | YES | YES |
| 24 | a | 133.31 | 0.07679 | YES | YES |
| 25 | a | 145.54 | 0.00828 | YES | YES |
| 26 | a | 146.03 | 0.03471 | YES | YES |
| 27 | a | 162.82 | 0.05936 | YES | YES |
| 28 | a | 166.86 | 0.02432 | YES | YES |
| 29 | a | 183.21 | 2.60054 | YES | YES |
| 30 | a | 193.48 | 0.22309 | YES | YES |
| 31 | a | 202.08 | 0.77681 | YES | YES |
| 32 | a | 207.99 | 0.84235 | YES | YES |
| 33 | a | 210.30 | 0.35967 | YES | YES |
| 34 | a | 235.82 | 0.88302 | YES | YES |
| 35 | a | 241.63 | 1.02069 | YES | YES |
| 36 | a | 260.28 | 0.86673 | YES | YES |
| 37 | a | 274.50 | 0.47981 | YES | YES |
| 38 | a | 286.64 | 2.06632 | YES | YES |
| 39 | a | 304.33 | 0.37570 | YES | YES |
| 40 | a | 310.51 | 1.71434 | YES | YES |
| 41 | a | 313.47 | 0.06436 | YES | YES |
| 42 | a | 316.48 | 0.14101 | YES | YES |
| 43 | a | 349.41 | 1.04936 | YES | YES |
| 44 | a | 365.27 | 1.99751 | YES | YES |
| 45 | a | 395.91 | 2.24213 | YES | YES |
| 46 | a | 398.31 | 1.98421 | YES | YES |
| 47 | a | 403.96 | 7.64162 | YES | YES |
| 48 | a | 406.62 | 0.72886 | YES | YES |
| 49 | a | 409.91 | 0.63984 | YES | YES |
| 50 | a | 412.42 | 0.61978 | YES | YES |

**2b**

|                                            |                                                                  |
|--------------------------------------------|------------------------------------------------------------------|
| SCF Energy (au) (RI)BP86/SV(P)             | -2331.1878343110                                                 |
| SCF Energy (au) PBE0/def2-TZVPP            | -2330.874749807                                                  |
| SCF Energy (au) PBE0/def2-TZVPP            | -2330.8925768748 (CH <sub>2</sub> Cl <sub>2</sub><br>correction) |
| Zero Point Energy (au)                     | 0.5809053                                                        |
| Chemical potential (kJ mol <sup>-1</sup> ) | 1323.46                                                          |
| Dispersion correction (au) PBE0/def2-TZVPP | -0.13063846                                                      |

xyz coordinates

77

|    |          |          |          |
|----|----------|----------|----------|
| Rh | 1.10131  | 0.20044  | 1.12945  |
| P  | 0.64201  | -0.49175 | -1.08511 |
| C  | -1.00736 | -0.12985 | -1.86265 |
| C  | -2.13556 | -0.82596 | -1.36999 |
| H  | -2.01850 | -1.56919 | -0.56422 |
| C  | -3.41380 | -0.59334 | -1.89530 |
| H  | -4.29702 | -1.13182 | -1.51828 |
| F  | -4.79378 | 0.58368  | -3.42417 |
| C  | -3.56686 | 0.35473  | -2.91698 |
| C  | -2.47152 | 1.06334  | -3.42387 |
| H  | -2.62585 | 1.79944  | -4.22814 |
| C  | -1.19393 | 0.81483  | -2.89354 |
| H  | -0.33513 | 1.36915  | -3.30263 |
| C  | 1.82269  | 0.35036  | -2.25469 |
| C  | 1.99862  | 1.74768  | -2.11502 |
| H  | 1.44361  | 2.28539  | -1.32869 |
| C  | 2.87282  | 2.45683  | -2.95165 |
| H  | 3.00857  | 3.54539  | -2.85516 |
| F  | 4.45118  | 2.42521  | -4.72211 |
| C  | 3.59957  | 1.75340  | -3.92406 |
| C  | 3.46287  | 0.36843  | -4.07700 |
| H  | 4.05426  | -0.15338 | -4.84559 |
| C  | 2.56823  | -0.32593 | -3.24367 |
| H  | 2.46070  | -1.41449 | -3.37091 |
| C  | 0.83633  | -2.29019 | -1.52469 |
| C  | 1.51541  | -3.14148 | -0.62788 |
| H  | 1.89089  | -2.72952 | 0.32232  |
| C  | 1.69942  | -4.50342 | -0.91536 |
| H  | 2.22336  | -5.17614 | -0.21888 |
| F  | 1.34956  | -6.32074 | -2.39673 |
| C  | 1.18511  | -5.01481 | -2.11378 |
| C  | 0.49414  | -4.20025 | -3.02324 |
| H  | 0.09487  | -4.64098 | -3.95016 |
| C  | 0.32234  | -2.84070 | -2.72223 |
| H  | -0.22923 | -2.20127 | -3.43059 |
| C  | -1.04759 | 2.34897  | 1.01048  |
| C  | 2.19722  | 1.96544  | 1.66233  |
| H  | 1.74717  | 2.92792  | 1.37244  |
| C  | 1.90472  | 1.23978  | 2.85764  |
| H  | 1.18439  | 1.54352  | 3.63265  |
| C  | 3.15381  | 0.35835  | 3.11947  |



|   |          |          |          |
|---|----------|----------|----------|
| H | 3.24772  | -0.07746 | 4.13237  |
| C | 4.29154  | 1.29341  | 2.61700  |
| H | 5.27991  | 0.78484  | 2.54052  |
| C | 3.61931  | 1.52914  | 1.23279  |
| H | 4.13700  | 2.18083  | 0.50447  |
| C | 3.36533  | 0.06903  | 0.78433  |
| H | 3.63271  | -0.33440 | -0.20252 |
| C | 3.07385  | -0.64847 | 1.94463  |
| H | 3.04659  | -1.74265 | 2.06242  |
| C | -3.09062 | 0.81560  | 2.14173  |
| C | -1.84256 | 0.22788  | 1.90189  |
| C | -0.76325 | 1.02106  | 1.33769  |
| C | -2.32103 | 2.95905  | 1.22458  |
| C | -3.37116 | 2.17230  | 1.82274  |
| H | -3.89067 | 0.22137  | 2.61625  |
| C | -1.64950 | -1.21537 | 2.21397  |
| C | -2.59386 | 4.31944  | 0.88509  |
| C | -4.64174 | 2.77804  | 2.06661  |
| C | -4.87501 | 4.10445  | 1.72718  |
| H | -5.43989 | 2.17119  | 2.52819  |
| C | -3.84091 | 4.88091  | 1.12993  |
| H | -1.79212 | 4.92279  | 0.42491  |
| H | -4.03423 | 5.93363  | 0.86321  |
| H | -5.86080 | 4.56029  | 1.91814  |
| H | 4.38471  | 2.22445  | 3.22068  |
| H | -0.26919 | 2.98608  | 0.55522  |
| C | -1.24866 | -3.98740 | 2.77070  |
| C | -0.19091 | -3.07454 | 2.91292  |
| C | -0.39318 | -1.71048 | 2.64220  |
| C | -2.70285 | -2.15532 | 2.07787  |
| C | -2.50729 | -3.51759 | 2.35311  |
| H | -1.09644 | -5.05791 | 2.98626  |
| H | 0.79688  | -3.42252 | 3.25948  |
| H | 0.42626  | -0.98125 | 2.84130  |
| H | -3.68908 | -1.81410 | 1.72265  |
| H | -3.34589 | -4.22338 | 2.22968  |

\$vibrational spectrum

| # | mode | symmetry | wave number | IR intensity | selection rules |       |
|---|------|----------|-------------|--------------|-----------------|-------|
| # | mode | symmetry | wave number | IR intensity | selection rules |       |
| # |      |          | cm** (-1)   | km/mol       | IR              | RAMAN |
|   | 1    |          | 0.00        | 0.00000      | -               | -     |
|   | 2    |          | 0.00        | 0.00000      | -               | -     |
|   | 3    |          | 0.00        | 0.00000      | -               | -     |
|   | 4    |          | 0.00        | 0.00000      | -               | -     |
|   | 5    |          | 0.00        | 0.00000      | -               | -     |
|   | 6    |          | 0.00        | 0.00000      | -               | -     |
|   | 7    | a        | 9.35        | 0.03384      | YES             | YES   |
|   | 8    | a        | 15.28       | 0.00541      | YES             | YES   |
|   | 9    | a        | 19.14       | 0.00738      | YES             | YES   |
|   | 10   | a        | 25.13       | 0.03623      | YES             | YES   |
|   | 11   | a        | 28.79       | 0.05525      | YES             | YES   |
|   | 12   | a        | 37.51       | 0.40454      | YES             | YES   |
|   | 13   | a        | 40.34       | 0.06657      | YES             | YES   |

|    |   |        |         |     |     |
|----|---|--------|---------|-----|-----|
| 14 | a | 42.16  | 0.11193 | YES | YES |
| 15 | a | 46.79  | 0.07237 | YES | YES |
| 16 | a | 49.76  | 0.20946 | YES | YES |
| 17 | a | 55.71  | 0.40205 | YES | YES |
| 18 | a | 59.34  | 0.15987 | YES | YES |
| 19 | a | 66.00  | 0.01671 | YES | YES |
| 20 | a | 68.74  | 0.00236 | YES | YES |
| 21 | a | 80.75  | 1.09143 | YES | YES |
| 22 | a | 86.61  | 0.56239 | YES | YES |
| 23 | a | 95.60  | 0.62816 | YES | YES |
| 24 | a | 110.92 | 0.63345 | YES | YES |
| 25 | a | 135.01 | 0.04213 | YES | YES |
| 26 | a | 147.85 | 0.51042 | YES | YES |
| 27 | a | 150.30 | 0.55652 | YES | YES |
| 28 | a | 155.46 | 0.62738 | YES | YES |
| 29 | a | 164.51 | 0.99330 | YES | YES |
| 30 | a | 174.27 | 0.34819 | YES | YES |
| 31 | a | 191.64 | 1.27952 | YES | YES |
| 32 | a | 202.90 | 0.38861 | YES | YES |
| 33 | a | 210.12 | 0.65366 | YES | YES |
| 34 | a | 230.78 | 0.21578 | YES | YES |
| 35 | a | 248.40 | 1.47328 | YES | YES |
| 36 | a | 253.32 | 1.28608 | YES | YES |
| 37 | a | 265.55 | 0.93491 | YES | YES |
| 38 | a | 277.78 | 0.09210 | YES | YES |
| 39 | a | 286.94 | 0.80683 | YES | YES |
| 40 | a | 308.62 | 0.33682 | YES | YES |
| 41 | a | 320.88 | 6.11374 | YES | YES |
| 42 | a | 330.94 | 0.26704 | YES | YES |
| 43 | a | 336.58 | 0.80929 | YES | YES |
| 44 | a | 340.54 | 1.72588 | YES | YES |
| 45 | a | 398.52 | 2.11121 | YES | YES |
| 46 | a | 400.09 | 5.57822 | YES | YES |
| 47 | a | 404.74 | 1.97036 | YES | YES |
| 48 | a | 405.89 | 1.47468 | YES | YES |
| 49 | a | 406.86 | 0.50428 | YES | YES |
| 50 | a | 408.48 | 0.03587 | YES | YES |

**ts<sub>III-4</sub>**

|                                            |                                                                  |
|--------------------------------------------|------------------------------------------------------------------|
| SCF Energy (au) (RI)BP86/SV(P)             | -2331.1545169800                                                 |
| SCF Energy (au) PBE0/def2-TZVPP            | -2330.838941383                                                  |
| SCF Energy (au) PBE0/def2-TZVPP            | -2330.8567051285 (CH <sub>2</sub> Cl <sub>2</sub><br>correction) |
| Zero Point Energy (au)                     | 0.5783580                                                        |
| Chemical potential (kJ mol <sup>-1</sup> ) | 1327.83                                                          |
| Dispersion correction (au) PBE0/def2-TZVPP | -0.13774722                                                      |

## xyz coordinates

77

|    |          |          |          |
|----|----------|----------|----------|
| Rh | -0.27446 | -0.34769 | -1.59953 |
| P  | 0.91057  | -0.19259 | 0.57947  |
| C  | 0.06548  | 1.64552  | -2.19152 |
| C  | -0.83956 | 2.58321  | -1.61062 |
| C  | -0.63453 | 3.96785  | -1.81672 |
| H  | -1.31708 | 4.70295  | -1.35964 |
| C  | 0.43065  | 4.42783  | -2.60485 |
| H  | 0.57338  | 5.51022  | -2.75977 |
| C  | 1.30595  | 3.50453  | -3.20619 |
| H  | 2.13840  | 3.85781  | -3.83818 |
| C  | 1.11620  | 2.12561  | -3.00413 |
| H  | 1.81111  | 1.42222  | -3.49503 |
| C  | 0.26942  | 1.07020  | 1.79005  |
| C  | 0.45990  | 2.42762  | 1.43845  |
| H  | 0.96359  | 2.69081  | 0.49516  |
| C  | 0.02788  | 3.46119  | 2.28023  |
| H  | 0.17586  | 4.51797  | 2.01005  |
| F  | -1.02549 | 4.12361  | 4.30036  |
| C  | -0.60658 | 3.13473  | 3.48631  |
| C  | -0.80414 | 1.80278  | 3.86694  |
| H  | -1.29662 | 1.57825  | 4.82590  |
| C  | -0.36380 | 0.77536  | 3.01523  |
| H  | -0.50956 | -0.26574 | 3.33808  |
| C  | 0.95836  | -1.78032 | 1.54279  |
| C  | -0.25381 | -2.33541 | 2.02281  |
| H  | -1.20905 | -1.80753 | 1.86595  |
| C  | -0.27741 | -3.57414 | 2.68136  |
| H  | -1.21803 | -4.00024 | 3.06368  |
| F  | 0.90513  | -5.47451 | 3.46799  |
| C  | 0.92124  | -4.28340 | 2.84079  |
| C  | 2.13233  | -3.78108 | 2.34951  |
| H  | 3.05550  | -4.36750 | 2.47828  |
| C  | 2.14399  | -2.53267 | 1.70462  |
| H  | 3.10177  | -2.14716 | 1.32264  |
| C  | 2.69498  | 0.34686  | 0.59804  |
| C  | 3.33249  | 0.77445  | -0.58316 |
| H  | 2.77245  | 0.78123  | -1.52892 |
| C  | 4.65854  | 1.24140  | -0.56654 |
| H  | 5.15869  | 1.58586  | -1.48462 |
| F  | 6.61790  | 1.71809  | 0.67927  |
| C  | 5.34652  | 1.27815  | 0.65128  |
| C  | 4.73605  | 0.87802  | 1.85038  |

|   |          |          |          |
|---|----------|----------|----------|
| H | 5.30160  | 0.93845  | 2.79331  |
| C | 3.41082  | 0.42417  | 1.81759  |
| H | 2.92433  | 0.13202  | 2.76249  |
| C | -1.93928 | 1.98619  | -0.84107 |
| C | -1.94477 | 0.57329  | -0.71217 |
| H | -0.87623 | 0.50756  | -2.83693 |
| C | -3.05206 | -0.03268 | -0.00525 |
| C | -3.21618 | -1.44430 | 0.16698  |
| H | -2.46920 | -2.11534 | -0.26457 |
| C | -4.29334 | -2.00038 | 0.84957  |
| H | -4.37228 | -3.09683 | 0.94210  |
| C | -5.29338 | -1.16814 | 1.41583  |
| H | -6.14667 | -1.61027 | 1.95646  |
| C | -5.18571 | 0.20804  | 1.27186  |
| H | -5.95516 | 0.87424  | 1.69911  |
| C | -4.09404 | 0.80441  | 0.57269  |
| C | -4.01855 | 2.22013  | 0.42827  |
| H | -4.81056 | 2.84773  | 0.87048  |
| C | -2.97204 | 2.79025  | -0.26595 |
| H | -2.93552 | 3.88569  | -0.38031 |
| C | 0.73647  | -1.24100 | -3.45084 |
| H | 0.97975  | -0.43990 | -4.16286 |
| C | 1.50691  | -1.68435 | -2.37451 |
| H | 2.49290  | -1.31788 | -2.06200 |
| C | 0.90262  | -3.04388 | -1.95754 |
| H | 1.52925  | -3.67846 | -1.30417 |
| C | 0.47340  | -3.61043 | -3.34194 |
| H | -0.16652 | -4.51779 | -3.26300 |
| H | 1.33350  | -3.80547 | -4.02234 |
| C | -0.32650 | -2.33175 | -3.71645 |
| H | -0.83081 | -2.28875 | -4.69998 |
| C | -1.23339 | -2.16760 | -2.47341 |
| H | -2.32584 | -2.05783 | -2.52458 |
| C | -0.46637 | -2.61902 | -1.38069 |
| H | -0.82134 | -2.96447 | -0.40236 |

\$vibrational spectrum

| # | mode | symmetry | wave number<br>cm** (-1) | IR intensity<br>km/mol | selection rules |       |
|---|------|----------|--------------------------|------------------------|-----------------|-------|
| # |      |          |                          |                        | IR              | RAMAN |
|   | 1    | a        | -695.83                  | 0.00000                | YES             | YES   |
|   | 2    |          | 0.00                     | 0.00000                | -               | -     |
|   | 3    |          | 0.00                     | 0.00000                | -               | -     |
|   | 4    |          | 0.00                     | 0.00000                | -               | -     |
|   | 5    |          | 0.00                     | 0.00000                | -               | -     |
|   | 6    |          | 0.00                     | 0.00000                | -               | -     |
|   | 7    |          | 0.00                     | 0.00000                | -               | -     |
|   | 8    | a        | 10.09                    | 0.09818                | YES             | YES   |
|   | 9    | a        | 14.26                    | 0.00291                | YES             | YES   |
|   | 10   | a        | 28.22                    | 0.02214                | YES             | YES   |
|   | 11   | a        | 32.07                    | 0.01790                | YES             | YES   |
|   | 12   | a        | 35.99                    | 0.02517                | YES             | YES   |
|   | 13   | a        | 40.26                    | 0.17285                | YES             | YES   |
|   | 14   | a        | 47.79                    | 0.43904                | YES             | YES   |
|   | 15   | a        | 54.33                    | 0.22265                | YES             | YES   |

|    |   |        |         |     |     |
|----|---|--------|---------|-----|-----|
| 16 | a | 61.68  | 0.19353 | YES | YES |
| 17 | a | 67.01  | 0.15668 | YES | YES |
| 18 | a | 73.26  | 0.30707 | YES | YES |
| 19 | a | 78.30  | 0.91726 | YES | YES |
| 20 | a | 95.73  | 0.03827 | YES | YES |
| 21 | a | 101.02 | 0.37458 | YES | YES |
| 22 | a | 112.93 | 0.93461 | YES | YES |
| 23 | a | 122.71 | 0.86179 | YES | YES |
| 24 | a | 129.87 | 1.04130 | YES | YES |
| 25 | a | 143.13 | 0.05277 | YES | YES |
| 26 | a | 148.15 | 0.14987 | YES | YES |
| 27 | a | 159.64 | 0.28202 | YES | YES |
| 28 | a | 161.97 | 0.22876 | YES | YES |
| 29 | a | 167.69 | 0.18471 | YES | YES |
| 30 | a | 187.66 | 1.53417 | YES | YES |
| 31 | a | 197.36 | 0.20492 | YES | YES |
| 32 | a | 200.08 | 0.43982 | YES | YES |
| 33 | a | 208.89 | 0.16919 | YES | YES |
| 34 | a | 216.53 | 0.85112 | YES | YES |
| 35 | a | 218.97 | 2.00330 | YES | YES |
| 36 | a | 236.97 | 0.36180 | YES | YES |
| 37 | a | 262.54 | 1.54934 | YES | YES |
| 38 | a | 277.75 | 1.99952 | YES | YES |
| 39 | a | 293.88 | 1.76643 | YES | YES |
| 40 | a | 306.16 | 0.46975 | YES | YES |
| 41 | a | 311.39 | 0.18122 | YES | YES |
| 42 | a | 317.86 | 0.17347 | YES | YES |
| 43 | a | 321.45 | 0.52518 | YES | YES |
| 44 | a | 345.48 | 1.30008 | YES | YES |
| 45 | a | 367.31 | 2.39107 | YES | YES |
| 46 | a | 395.39 | 2.88920 | YES | YES |
| 47 | a | 398.91 | 2.63613 | YES | YES |
| 48 | a | 403.41 | 6.91119 | YES | YES |
| 49 | a | 406.47 | 1.23050 | YES | YES |
| 50 | a | 409.83 | 0.11391 | YES | YES |

**ts4-2a**

|                                            |                                                                  |
|--------------------------------------------|------------------------------------------------------------------|
| SCF Energy (au) (RI)BP86/SV(P)             | -2331.1581837150                                                 |
| SCF Energy (au) PBE0/def2-TZVPP            | -2330.841951061                                                  |
| SCF Energy (au) PBE0/def2-TZVPP            | -2330.8595897220 (CH <sub>2</sub> Cl <sub>2</sub><br>correction) |
| Zero Point Energy (au)                     | 0.5783433                                                        |
| Chemical potential (kJ mol <sup>-1</sup> ) | 1328.22                                                          |
| Dispersion correction (au) PBE0/def2-TZVPP | -0.13636541                                                      |

## xyz coordinates

77

|    |          |          |          |
|----|----------|----------|----------|
| Rh | -0.29787 | -0.07354 | -1.60336 |
| P  | 0.93365  | -0.26288 | 0.58837  |
| C  | 0.07489  | 1.91018  | -1.88802 |
| C  | -0.90373 | 2.81075  | -1.36604 |
| C  | -0.75146 | 4.20437  | -1.55837 |
| H  | -1.50287 | 4.90305  | -1.15385 |
| C  | 0.34182  | 4.71637  | -2.27267 |
| H  | 0.44485  | 5.80425  | -2.42011 |
| C  | 1.29324  | 3.83308  | -2.81218 |
| H  | 2.14575  | 4.22292  | -3.39458 |
| C  | 1.15467  | 2.44399  | -2.62009 |
| H  | 1.90709  | 1.77800  | -3.07797 |
| C  | 0.35062  | 0.81044  | 1.99525  |
| C  | 0.26002  | 2.19828  | 1.74201  |
| H  | 0.47018  | 2.59169  | 0.73531  |
| C  | -0.08242 | 3.09866  | 2.76060  |
| H  | -0.15513 | 4.17987  | 2.56676  |
| F  | -0.67624 | 3.46323  | 5.02854  |
| C  | -0.34106 | 2.60475  | 4.04582  |
| C  | -0.24999 | 1.23730  | 4.33273  |
| H  | -0.44901 | 0.88211  | 5.35587  |
| C  | 0.10107  | 0.34622  | 3.30513  |
| H  | 0.18825  | -0.72355 | 3.54859  |
| C  | 0.86626  | -1.97981 | 1.29185  |
| C  | -0.34767 | -2.46846 | 1.83366  |
| H  | -1.22652 | -1.80861 | 1.91316  |
| C  | -0.46935 | -3.79969 | 2.26074  |
| H  | -1.41037 | -4.17848 | 2.68909  |
| F  | 0.51930  | -5.93860 | 2.53790  |
| C  | 0.62989  | -4.66038 | 2.13057  |
| C  | 1.83851  | -4.21658 | 1.57936  |
| H  | 2.68144  | -4.91859 | 1.48294  |
| C  | 1.94906  | -2.87924 | 1.16294  |
| H  | 2.90207  | -2.53893 | 0.72848  |
| C  | 2.75051  | 0.14505  | 0.71064  |
| C  | 3.38203  | 0.87478  | -0.31611 |
| H  | 2.80503  | 1.17457  | -1.20227 |
| C  | 4.72750  | 1.26683  | -0.20777 |
| H  | 5.22395  | 1.84346  | -1.00347 |
| F  | 6.73307  | 1.28405  | 1.05659  |
| C  | 5.44209  | 0.92030  | 0.94434  |
| C  | 4.83926  | 0.20956  | 1.99394  |

|   |          |          |          |
|---|----------|----------|----------|
| H | 5.42653  | -0.03021 | 2.89412  |
| C | 3.49411  | -0.16503 | 1.87466  |
| H | 3.01739  | -0.70300 | 2.71018  |
| C | -2.02330 | 2.17486  | -0.65865 |
| C | -2.02347 | 0.75927  | -0.65728 |
| H | -1.69505 | 0.37097  | -2.26845 |
| C | -3.10044 | 0.06398  | 0.00095  |
| C | -3.18881 | -1.36118 | 0.07067  |
| H | -2.38584 | -1.95584 | -0.38405 |
| C | -4.24425 | -2.00718 | 0.70651  |
| H | -4.27683 | -3.10952 | 0.73216  |
| C | -5.27900 | -1.25444 | 1.32279  |
| H | -6.11548 | -1.76937 | 1.82381  |
| C | -5.22561 | 0.13328  | 1.29268  |
| H | -6.01852 | 0.73081  | 1.77482  |
| C | -4.15697 | 0.82301  | 0.64640  |
| C | -4.10487 | 2.24912  | 0.62397  |
| H | -4.90904 | 2.82040  | 1.11768  |
| C | -3.06277 | 2.90421  | -0.00537 |
| H | -3.03948 | 4.00622  | -0.00564 |
| C | 0.42422  | -0.54093 | -3.62209 |
| H | 0.46560  | 0.35735  | -4.25487 |
| C | 1.41853  | -0.98730 | -2.71646 |
| H | 2.40221  | -0.52889 | -2.54700 |
| C | 1.15175  | -2.50402 | -2.52220 |
| H | 1.97170  | -3.08991 | -2.06669 |
| C | 0.67450  | -2.89949 | -3.95035 |
| H | 0.25547  | -3.93009 | -4.00496 |
| H | 1.46076  | -2.76362 | -4.72644 |
| C | -0.41438 | -1.78980 | -3.98812 |
| H | -1.05132 | -1.70118 | -4.88809 |
| C | -1.14690 | -2.06687 | -2.66153 |
| H | -2.23980 | -2.07014 | -2.54794 |
| C | -0.19397 | -2.51592 | -1.76444 |
| H | -0.35903 | -2.96034 | -0.77511 |

\$vibrational spectrum

| # | mode | symmetry | wave number<br>cm** (-1) | IR intensity<br>km/mol | selection rules |       |
|---|------|----------|--------------------------|------------------------|-----------------|-------|
| # |      |          |                          |                        | IR              | RAMAN |
|   | 1    | a        | -634.77                  | 0.00000                | YES             | YES   |
|   | 2    |          | 0.00                     | 0.00000                | -               | -     |
|   | 3    |          | 0.00                     | 0.00000                | -               | -     |
|   | 4    |          | 0.00                     | 0.00000                | -               | -     |
|   | 5    |          | 0.00                     | 0.00000                | -               | -     |
|   | 6    |          | 0.00                     | 0.00000                | -               | -     |
|   | 7    |          | 0.00                     | 0.00000                | -               | -     |
|   | 8    | a        | 10.77                    | 0.02186                | YES             | YES   |
|   | 9    | a        | 18.34                    | 0.05803                | YES             | YES   |
|   | 10   | a        | 30.20                    | 0.02758                | YES             | YES   |
|   | 11   | a        | 30.88                    | 0.01001                | YES             | YES   |
|   | 12   | a        | 37.54                    | 0.01443                | YES             | YES   |
|   | 13   | a        | 39.71                    | 0.11381                | YES             | YES   |
|   | 14   | a        | 48.81                    | 0.44764                | YES             | YES   |
|   | 15   | a        | 54.87                    | 0.23706                | YES             | YES   |

|    |   |        |         |     |     |
|----|---|--------|---------|-----|-----|
| 16 | a | 62.75  | 0.33951 | YES | YES |
| 17 | a | 65.87  | 0.12546 | YES | YES |
| 18 | a | 77.05  | 0.47183 | YES | YES |
| 19 | a | 80.55  | 0.18337 | YES | YES |
| 20 | a | 82.21  | 0.43556 | YES | YES |
| 21 | a | 99.31  | 0.50223 | YES | YES |
| 22 | a | 107.88 | 0.73926 | YES | YES |
| 23 | a | 121.67 | 1.68362 | YES | YES |
| 24 | a | 132.96 | 0.04523 | YES | YES |
| 25 | a | 138.33 | 0.12199 | YES | YES |
| 26 | a | 140.59 | 0.07035 | YES | YES |
| 27 | a | 157.63 | 0.18796 | YES | YES |
| 28 | a | 163.74 | 0.05465 | YES | YES |
| 29 | a | 165.78 | 0.10638 | YES | YES |
| 30 | a | 170.34 | 0.25647 | YES | YES |
| 31 | a | 192.88 | 0.35581 | YES | YES |
| 32 | a | 202.56 | 0.71123 | YES | YES |
| 33 | a | 210.78 | 0.40136 | YES | YES |
| 34 | a | 217.92 | 2.28285 | YES | YES |
| 35 | a | 231.88 | 1.06918 | YES | YES |
| 36 | a | 237.32 | 0.82055 | YES | YES |
| 37 | a | 240.44 | 0.37318 | YES | YES |
| 38 | a | 282.23 | 3.24009 | YES | YES |
| 39 | a | 299.85 | 0.47002 | YES | YES |
| 40 | a | 305.63 | 2.57719 | YES | YES |
| 41 | a | 316.36 | 0.02722 | YES | YES |
| 42 | a | 318.27 | 0.77266 | YES | YES |
| 43 | a | 323.35 | 1.57569 | YES | YES |
| 44 | a | 351.10 | 0.46432 | YES | YES |
| 45 | a | 369.91 | 1.68024 | YES | YES |
| 46 | a | 395.93 | 2.98136 | YES | YES |
| 47 | a | 397.94 | 2.48237 | YES | YES |
| 48 | a | 403.42 | 7.13537 | YES | YES |
| 49 | a | 407.30 | 4.45040 | YES | YES |
| 50 | a | 411.21 | 0.15294 | YES | YES |



ts<sub>2a'</sub>-5

|                                            |                                                                  |
|--------------------------------------------|------------------------------------------------------------------|
| SCF Energy (au) (RI)BP86/SV(P)             | -2331.1635465730                                                 |
| SCF Energy (au) PBE0/def2-TZVPP            | -2330.846999193                                                  |
| SCF Energy (au) PBE0/def2-TZVPP            | -2330.8647426048 (CH <sub>2</sub> Cl <sub>2</sub><br>correction) |
| Zero Point Energy (au)                     | 0.5780973                                                        |
| Chemical potential (kJ mol <sup>-1</sup> ) | 1619.93                                                          |
| Dispersion correction (au) PBE0/def2-TZVPP | -0.13304516                                                      |

xyz coordinates

77

|    |          |          |          |
|----|----------|----------|----------|
| Rh | -0.29895 | -0.30758 | -1.62590 |
| P  | 1.11631  | -0.45617 | 0.46879  |
| C  | 0.09949  | 1.67865  | -1.84151 |
| C  | -0.81522 | 2.57545  | -1.20766 |
| C  | -0.60913 | 3.97072  | -1.30460 |
| H  | -1.31289 | 4.66697  | -0.81794 |
| C  | 0.47769  | 4.48642  | -2.02626 |
| H  | 0.62265  | 5.57718  | -2.10001 |
| C  | 1.36938  | 3.60694  | -2.66942 |
| H  | 2.21771  | 4.00638  | -3.25167 |
| C  | 1.17582  | 2.21403  | -2.57754 |
| H  | 1.89237  | 1.54489  | -3.08484 |
| C  | 0.52330  | -1.67290 | 1.74586  |
| C  | -0.87237 | -1.81364 | 1.91355  |
| H  | -1.55685 | -1.24261 | 1.26563  |
| C  | -1.40489 | -2.64902 | 2.90775  |
| H  | -2.49256 | -2.75161 | 3.04802  |
| F  | -1.02703 | -4.17113 | 4.68687  |
| C  | -0.52700 | -3.36001 | 3.73657  |
| C  | 0.86312  | -3.24041 | 3.60118  |
| H  | 1.52351  | -3.80669 | 4.27590  |
| C  | 1.38182  | -2.38917 | 2.61217  |
| H  | 2.47450  | -2.28002 | 2.52856  |
| C  | 2.88483  | -0.99145 | 0.20491  |
| C  | 3.18531  | -2.35888 | -0.00298 |
| H  | 2.39018  | -3.11657 | 0.07613  |
| C  | 4.49114  | -2.78718 | -0.28607 |
| H  | 4.72665  | -3.85258 | -0.43531 |
| F  | 6.76926  | -2.23607 | -0.65203 |
| C  | 5.51405  | -1.83325 | -0.37747 |
| C  | 5.25387  | -0.47165 | -0.18141 |
| H  | 6.07885  | 0.25449  | -0.24959 |
| C  | 3.94302  | -0.06020 | 0.11144  |
| H  | 3.75618  | 1.01080  | 0.28241  |
| C  | 1.33063  | 1.07070  | 1.51996  |
| C  | 1.71449  | 2.29558  | 0.92363  |
| H  | 1.83957  | 2.37080  | -0.16648 |
| C  | 1.93571  | 3.44343  | 1.70078  |
| H  | 2.23394  | 4.39502  | 1.23506  |
| F  | 1.96408  | 4.47141  | 3.83826  |
| C  | 1.75504  | 3.37309  | 3.08714  |

|   |          |          |          |
|---|----------|----------|----------|
| C | 1.35673  | 2.18292  | 3.70858  |
| H | 1.21616  | 2.15972  | 4.80045  |
| C | 1.14728  | 1.03978  | 2.92206  |
| H | 0.83707  | 0.11093  | 3.42277  |
| C | -1.95464 | 1.93723  | -0.52697 |
| C | -2.01822 | 0.49935  | -0.68956 |
| H | -1.68345 | 0.20030  | -2.26996 |
| C | -3.13194 | -0.18540 | -0.20671 |
| C | -6.20415 | 1.85719  | 1.94395  |
| H | -6.99711 | 2.38320  | 2.50115  |
| C | -6.30776 | 0.45472  | 1.72400  |
| H | -7.18083 | -0.09690 | 2.11109  |
| C | -5.31430 | -0.21802 | 1.02249  |
| H | -5.39491 | -1.30516 | 0.84804  |
| C | -4.17583 | 0.47613  | 0.51214  |
| C | -4.07287 | 1.90166  | 0.72975  |
| C | -5.11057 | 2.56211  | 1.45600  |
| C | -2.95220 | 2.59795  | 0.19054  |
| H | -2.89818 | 3.68934  | 0.34453  |
| C | 0.28023  | -0.81968 | -3.68160 |
| H | 0.27995  | 0.06641  | -4.33344 |
| C | 1.33675  | -1.26530 | -2.85643 |
| H | 2.32753  | -0.80412 | -2.73989 |
| C | 1.04353  | -2.76414 | -2.57814 |
| H | 1.89074  | -3.36626 | -2.20578 |
| C | 0.39975  | -3.19624 | -3.92632 |
| H | -0.06049 | -4.20976 | -3.88753 |
| H | 1.10446  | -3.12685 | -4.78507 |
| C | -0.64292 | -2.04667 | -3.90069 |
| H | -1.36936 | -1.96865 | -4.73139 |
| C | -1.24316 | -2.23832 | -2.48627 |
| H | -2.31994 | -2.24355 | -2.26381 |
| C | -0.20961 | -2.69076 | -1.67218 |
| H | -0.29904 | -3.11393 | -0.66176 |
| H | -3.23511 | -1.27375 | -0.36705 |
| H | -5.03117 | 3.65035  | 1.62112  |

\$vibrational spectrum

| #  | mode | symmetry | wave number<br>cm**(-1) | IR intensity<br>km/mol | selection rules<br>IR | RAMAN |
|----|------|----------|-------------------------|------------------------|-----------------------|-------|
| #  |      |          |                         |                        |                       |       |
| 1  |      | a        | -612.68                 | 0.00000                | YES                   | YES   |
| 2  |      |          | 0.00                    | 0.00000                | -                     | -     |
| 3  |      |          | 0.00                    | 0.00000                | -                     | -     |
| 4  |      |          | 0.00                    | 0.00000                | -                     | -     |
| 5  |      |          | 0.00                    | 0.00000                | -                     | -     |
| 6  |      |          | 0.00                    | 0.00000                | -                     | -     |
| 7  |      |          | 0.00                    | 0.00000                | -                     | -     |
| 8  |      | a        | 8.91                    | 0.02639                | YES                   | YES   |
| 9  |      | a        | 19.38                   | 0.00422                | YES                   | YES   |
| 10 |      | a        | 25.78                   | 0.05931                | YES                   | YES   |
| 11 |      | a        | 31.11                   | 0.01667                | YES                   | YES   |
| 12 |      | a        | 34.72                   | 0.18660                | YES                   | YES   |
| 13 |      | a        | 43.54                   | 0.06645                | YES                   | YES   |
| 14 |      | a        | 47.17                   | 0.10706                | YES                   | YES   |

|    |   |        |         |     |     |
|----|---|--------|---------|-----|-----|
| 15 | a | 56.40  | 0.51061 | YES | YES |
| 16 | a | 66.58  | 0.25673 | YES | YES |
| 17 | a | 71.41  | 0.03306 | YES | YES |
| 18 | a | 72.34  | 0.07960 | YES | YES |
| 19 | a | 77.17  | 0.54784 | YES | YES |
| 20 | a | 80.24  | 0.03362 | YES | YES |
| 21 | a | 92.49  | 1.27581 | YES | YES |
| 22 | a | 96.28  | 0.97087 | YES | YES |
| 23 | a | 114.22 | 0.74942 | YES | YES |
| 24 | a | 119.16 | 0.84956 | YES | YES |
| 25 | a | 139.62 | 0.12276 | YES | YES |
| 26 | a | 149.47 | 0.23380 | YES | YES |
| 27 | a | 152.60 | 0.29838 | YES | YES |
| 28 | a | 155.27 | 0.34878 | YES | YES |
| 29 | a | 170.61 | 0.02609 | YES | YES |
| 30 | a | 191.16 | 1.35705 | YES | YES |
| 31 | a | 198.42 | 0.19021 | YES | YES |
| 32 | a | 211.90 | 0.31573 | YES | YES |
| 33 | a | 213.62 | 0.52945 | YES | YES |
| 34 | a | 219.57 | 0.16674 | YES | YES |
| 35 | a | 229.92 | 0.55462 | YES | YES |
| 36 | a | 243.29 | 0.43457 | YES | YES |
| 37 | a | 259.78 | 0.29119 | YES | YES |
| 38 | a | 285.51 | 4.05137 | YES | YES |
| 39 | a | 298.61 | 1.01476 | YES | YES |
| 40 | a | 307.86 | 0.24314 | YES | YES |
| 41 | a | 318.56 | 1.98280 | YES | YES |
| 42 | a | 327.15 | 3.75179 | YES | YES |
| 43 | a | 327.66 | 0.03416 | YES | YES |
| 44 | a | 339.74 | 0.94075 | YES | YES |
| 45 | a | 369.03 | 1.36396 | YES | YES |
| 46 | a | 395.74 | 3.83141 | YES | YES |
| 47 | a | 399.67 | 3.72874 | YES | YES |
| 48 | a | 402.45 | 4.36197 | YES | YES |
| 49 | a | 407.21 | 0.65460 | YES | YES |
| 50 | a | 411.58 | 0.76384 | YES | YES |

ts<sub>5-2b</sub>

|                                            |                                                                  |
|--------------------------------------------|------------------------------------------------------------------|
| SCF Energy (au) (RI)BP86/SV(P)             | -2331.1653858650                                                 |
| SCF Energy (au) PBE0/def2-TZVPP            | -2330.848815209                                                  |
| SCF Energy (au) PBE0/def2-TZVPP            | -2330.8671897882 (CH <sub>2</sub> Cl <sub>2</sub><br>correction) |
| Zero Point Energy (au)                     | 0.577859                                                         |
| Chemical potential (kJ mol <sup>-1</sup> ) | 1326.17                                                          |
| Dispersion correction (au) PBE0/def2-TZVPP | -0.13489117                                                      |

xyz coordinates

77

|    |          |          |          |
|----|----------|----------|----------|
| Rh | -0.11379 | -0.51271 | -1.65539 |
| P  | 1.09055  | -0.34963 | 0.50276  |
| C  | 0.18048  | 1.52735  | -2.15783 |
| C  | -0.78277 | 2.40595  | -1.56871 |
| C  | -0.64670 | 3.80329  | -1.73099 |
| H  | -1.37971 | 4.48488  | -1.26792 |
| C  | 0.41252  | 4.33910  | -2.47818 |
| H  | 0.50528  | 5.43133  | -2.59862 |
| C  | 1.34641  | 3.47784  | -3.08536 |
| H  | 2.17350  | 3.89219  | -3.68679 |
| C  | 1.21958  | 2.08487  | -2.93308 |
| H  | 1.94872  | 1.42697  | -3.43806 |
| C  | 0.54544  | 1.00545  | 1.65699  |
| C  | 0.82104  | 2.33177  | 1.24763  |
| H  | 1.33656  | 2.52277  | 0.29376  |
| C  | 0.45970  | 3.42500  | 2.04675  |
| H  | 0.67265  | 4.45784  | 1.73123  |
| F  | -0.54023 | 4.23665  | 4.03879  |
| C  | -0.18862 | 3.19020  | 3.26647  |
| C  | -0.46808 | 1.89036  | 3.70426  |
| H  | -0.96982 | 1.73854  | 4.67243  |
| C  | -0.09794 | 0.80294  | 2.89589  |
| H  | -0.30681 | -0.21286 | 3.26214  |
| C  | 0.99937  | -1.89398 | 1.52589  |
| C  | -0.26734 | -2.32902 | 1.99001  |
| H  | -1.16643 | -1.72456 | 1.78524  |
| C  | -0.40968 | -3.53359 | 2.69493  |
| H  | -1.39046 | -3.86857 | 3.06714  |
| F  | 0.59299  | -5.48892 | 3.58897  |
| C  | 0.72320  | -4.32980 | 2.91670  |
| C  | 1.98422  | -3.94704 | 2.44369  |
| H  | 2.85244  | -4.60032 | 2.62338  |
| C  | 2.11540  | -2.73060 | 1.75214  |
| H  | 3.11116  | -2.43864 | 1.38403  |
| C  | 2.90913  | 0.04967  | 0.48570  |
| C  | 3.55548  | 0.38215  | -0.72190 |
| H  | 2.98007  | 0.38700  | -1.65926 |
| C  | 4.91215  | 0.74966  | -0.74365 |
| H  | 5.42161  | 1.01800  | -1.68199 |
| F  | 6.92236  | 1.12826  | 0.45335  |
| C  | 5.62180  | 0.78351  | 0.46223  |

|   |          |          |          |
|---|----------|----------|----------|
| C | 5.00464  | 0.47784  | 1.68556  |
| H | 5.58959  | 0.53410  | 2.61686  |
| C | 3.64909  | 0.12232  | 1.69068  |
| H | 3.15821  | -0.09343 | 2.65380  |
| C | -1.86875 | 1.73680  | -0.83386 |
| C | -1.76682 | 0.29480  | -0.77311 |
| H | -0.68647 | 0.32617  | -2.90709 |
| C | -2.78385 | -0.42765 | -0.15876 |
| C | -6.11901 | 1.55997  | 1.63002  |
| H | -6.97877 | 2.07162  | 2.09378  |
| C | -6.04211 | 0.13879  | 1.65996  |
| H | -6.84403 | -0.44196 | 2.14600  |
| C | -4.96289 | -0.51640 | 1.07851  |
| H | -4.90487 | -1.61871 | 1.09930  |
| C | -3.91254 | 0.21391  | 0.44467  |
| C | -3.99338 | 1.65647  | 0.40922  |
| C | -2.95637 | 2.38239  | -0.24244 |
| H | -3.03880 | 3.48229  | -0.27784 |
| C | 0.92605  | -1.55261 | -3.46406 |
| H | 1.28203  | -0.78783 | -4.16952 |
| C | 1.58703  | -2.04900 | -2.34551 |
| H | 2.58054  | -1.76707 | -1.97361 |
| C | 0.80975  | -3.30922 | -1.90445 |
| H | 1.33703  | -3.98911 | -1.21004 |
| C | 0.37008  | -3.86890 | -3.28865 |
| H | -0.37867 | -4.68847 | -3.20779 |
| H | 1.22518  | -4.19156 | -3.92542 |
| C | -0.25368 | -2.51769 | -3.73816 |
| H | -0.71143 | -2.45315 | -4.74319 |
| C | -1.18715 | -2.21206 | -2.53928 |
| H | -2.26267 | -2.00382 | -2.63884 |
| C | -0.52431 | -2.70779 | -1.39322 |
| H | -0.98301 | -2.98310 | -0.43422 |
| H | -2.75563 | -1.53163 | -0.12859 |
| C | -5.11577 | 2.29930  | 1.01640  |
| H | -5.17366 | 3.40109  | 0.98814  |

\$vibrational spectrum

| #  | mode | symmetry | wave number<br>cm**(-1) | IR intensity<br>km/mol | selection rules |       |
|----|------|----------|-------------------------|------------------------|-----------------|-------|
| #  |      |          |                         |                        | IR              | RAMAN |
| 1  |      | a        | -619.77                 | 0.00000                | YES             | YES   |
| 2  |      |          | 0.00                    | 0.00000                | -               | -     |
| 3  |      |          | 0.00                    | 0.00000                | -               | -     |
| 4  |      |          | 0.00                    | 0.00000                | -               | -     |
| 5  |      |          | 0.00                    | 0.00000                | -               | -     |
| 6  |      |          | 0.00                    | 0.00000                | -               | -     |
| 7  |      |          | 0.00                    | 0.00000                | -               | -     |
| 8  |      | a        | 12.07                   | 0.01379                | YES             | YES   |
| 9  |      | a        | 16.56                   | 0.05870                | YES             | YES   |
| 10 |      | a        | 23.84                   | 0.03377                | YES             | YES   |
| 11 |      | a        | 32.42                   | 0.01279                | YES             | YES   |
| 12 |      | a        | 36.13                   | 0.00222                | YES             | YES   |
| 13 |      | a        | 40.54                   | 0.10194                | YES             | YES   |
| 14 |      | a        | 48.62                   | 0.52121                | YES             | YES   |

|    |   |        |         |     |     |
|----|---|--------|---------|-----|-----|
| 15 | a | 56.26  | 0.12798 | YES | YES |
| 16 | a | 64.21  | 0.20062 | YES | YES |
| 17 | a | 65.76  | 0.21918 | YES | YES |
| 18 | a | 72.75  | 0.58934 | YES | YES |
| 19 | a | 78.25  | 1.00405 | YES | YES |
| 20 | a | 81.39  | 0.32223 | YES | YES |
| 21 | a | 98.41  | 0.38187 | YES | YES |
| 22 | a | 102.44 | 0.16395 | YES | YES |
| 23 | a | 110.01 | 0.49564 | YES | YES |
| 24 | a | 128.19 | 1.25497 | YES | YES |
| 25 | a | 133.94 | 0.15156 | YES | YES |
| 26 | a | 145.27 | 0.20335 | YES | YES |
| 27 | a | 152.06 | 0.24543 | YES | YES |
| 28 | a | 159.19 | 0.19157 | YES | YES |
| 29 | a | 164.88 | 0.04016 | YES | YES |
| 30 | a | 191.94 | 1.52609 | YES | YES |
| 31 | a | 197.21 | 0.12679 | YES | YES |
| 32 | a | 207.92 | 0.55336 | YES | YES |
| 33 | a | 208.96 | 1.24726 | YES | YES |
| 34 | a | 217.30 | 0.10188 | YES | YES |
| 35 | a | 236.21 | 0.35112 | YES | YES |
| 36 | a | 245.26 | 0.61247 | YES | YES |
| 37 | a | 259.78 | 1.02795 | YES | YES |
| 38 | a | 292.39 | 2.79822 | YES | YES |
| 39 | a | 302.93 | 0.74289 | YES | YES |
| 40 | a | 305.57 | 0.00158 | YES | YES |
| 41 | a | 306.72 | 2.33179 | YES | YES |
| 42 | a | 317.57 | 0.71154 | YES | YES |
| 43 | a | 319.47 | 1.33576 | YES | YES |
| 44 | a | 344.26 | 1.09970 | YES | YES |
| 45 | a | 363.94 | 1.72764 | YES | YES |
| 46 | a | 396.50 | 2.31213 | YES | YES |
| 47 | a | 398.72 | 2.81459 | YES | YES |
| 48 | a | 403.88 | 7.99887 | YES | YES |
| 49 | a | 406.74 | 0.56741 | YES | YES |
| 50 | a | 409.99 | 0.35852 | YES | YES |

## X-ray powder diffraction

Powder diffraction data was collected with a Bruker D8 diffractometer using copper K $\alpha$  radiation at room temperature over the range 5 – 80° 2 $\theta$  with a step size of 0.01° 2 $\theta$ . Approximately 30 mg of as-crystallised sample was placed on a silicon low-background holder and spun at 1 Hz during data collection. The data was modelled by the Rietveld<sup>1,2</sup> method with TOPAS,<sup>3,4</sup> using the current single-crystal structure. Unit cell parameters were refined with atomic coordinates remaining fixed. A preferred orientation correction<sup>5</sup> was applied to correct model intensities.

**Figure S1.** X-ray powder diffraction spectra of Rh(nbd)(P(4-FC<sub>6</sub>H<sub>4</sub>)<sub>3</sub>)(2-NaphthPh) (**2**). In red is shown the predicted spectra based on the obtained single-crystal structure and in blue is the experimentally obtained spectra of a bulk sample of Rh(nbd)(P(4-FC<sub>6</sub>H<sub>4</sub>)<sub>3</sub>)(2-NaphthPh)

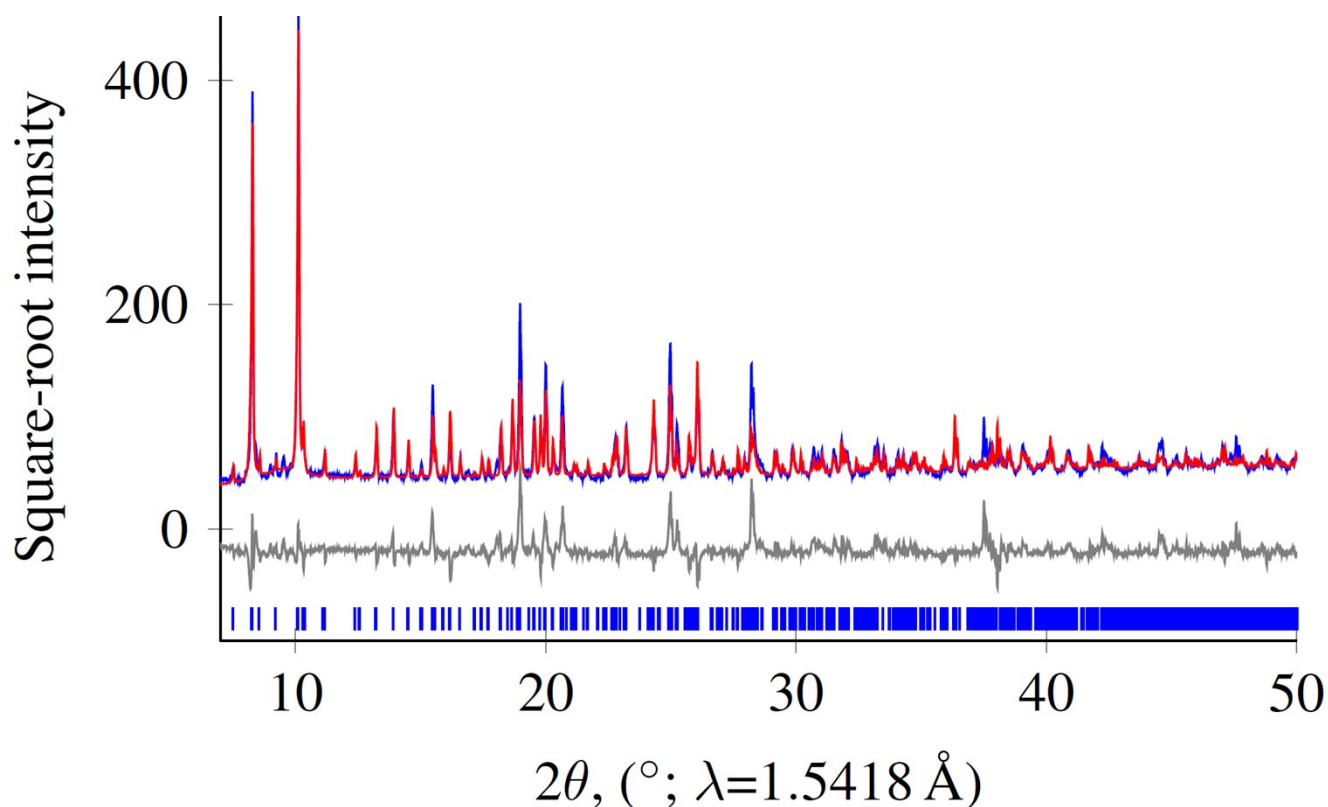

## NMR spectra

**Figure S2.**  $^{31}\text{P}\{^1\text{H}\}$  NMR spectrum, in  $\text{CDCl}_3$ , of  $\text{P}(\text{4-FC}_6\text{H}_4)_3$ . Phosphine oxide is seen at ca. 27 ppm.

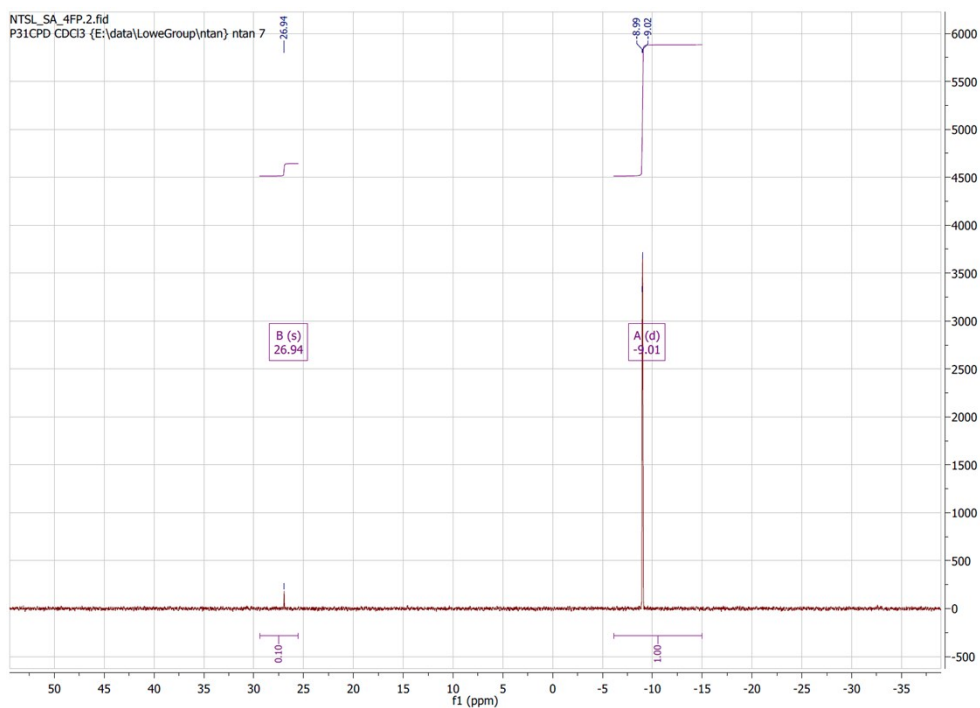

**Figure S3.**  $^1\text{H}$  NMR spectra, aromatic region expanded

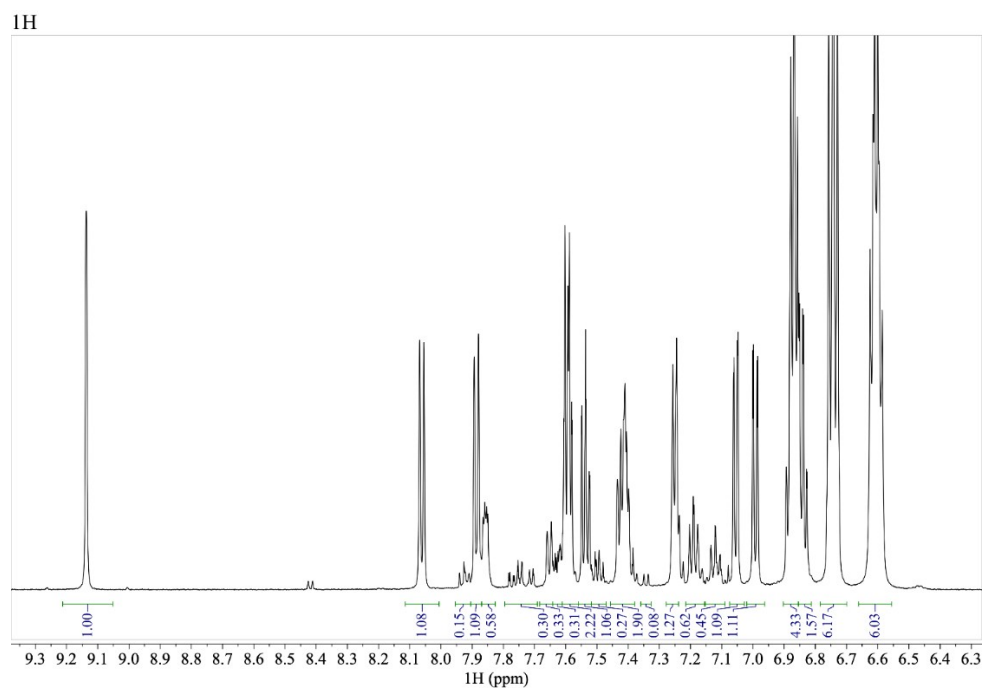



Figure S4.  $^{13}\text{C}\{^1\text{H}\}$  full

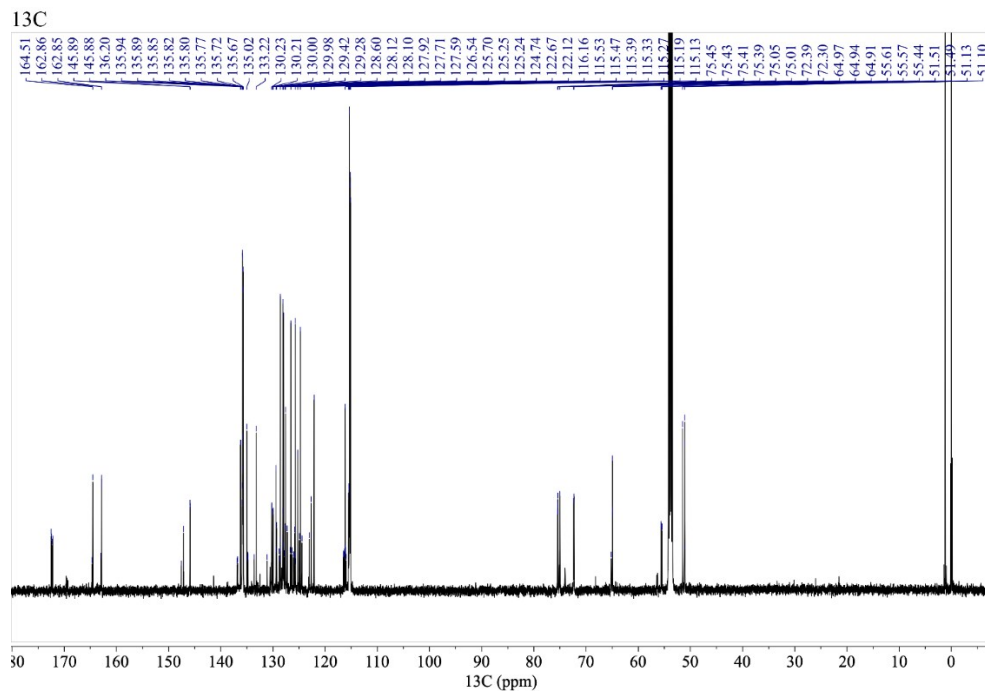

Figure S5.  $^{13}\text{C}\{^1\text{H}\}$  aromatic region

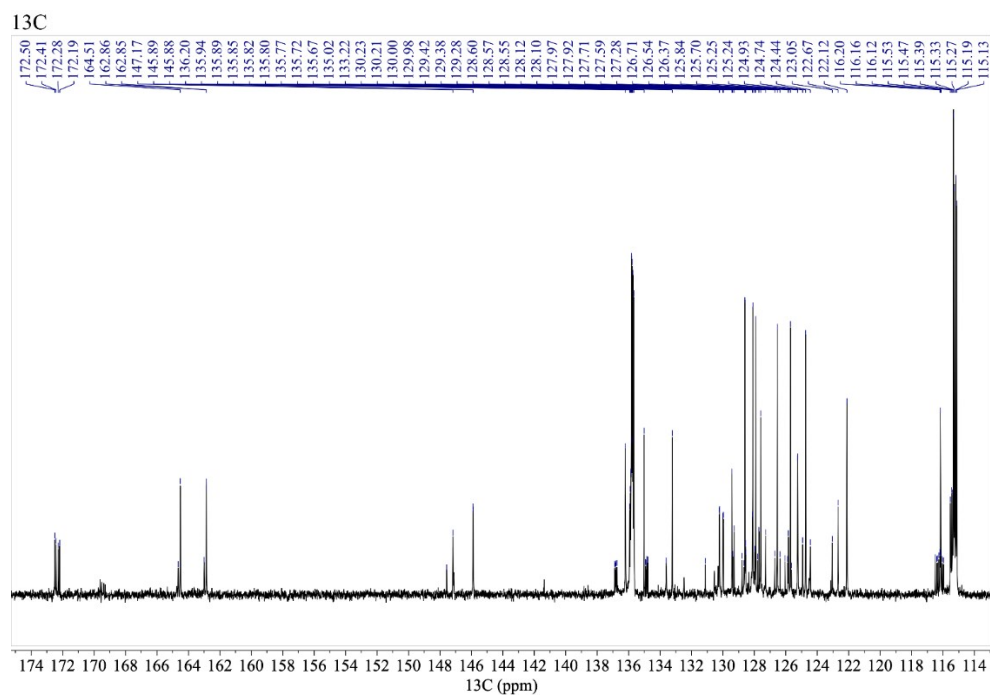

**Figure S6.  $^{13}\text{C}\{^1\text{H}\}$  expanded**

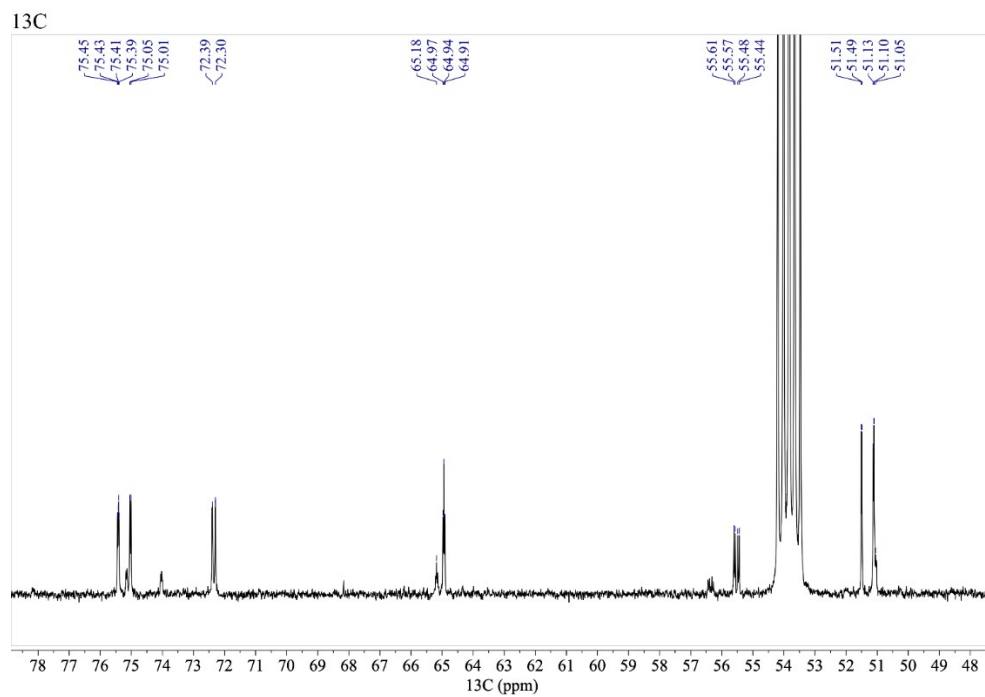

**Figure S7.  $^{19}\text{F}\{^1\text{H}\}$  NMR spectrum**

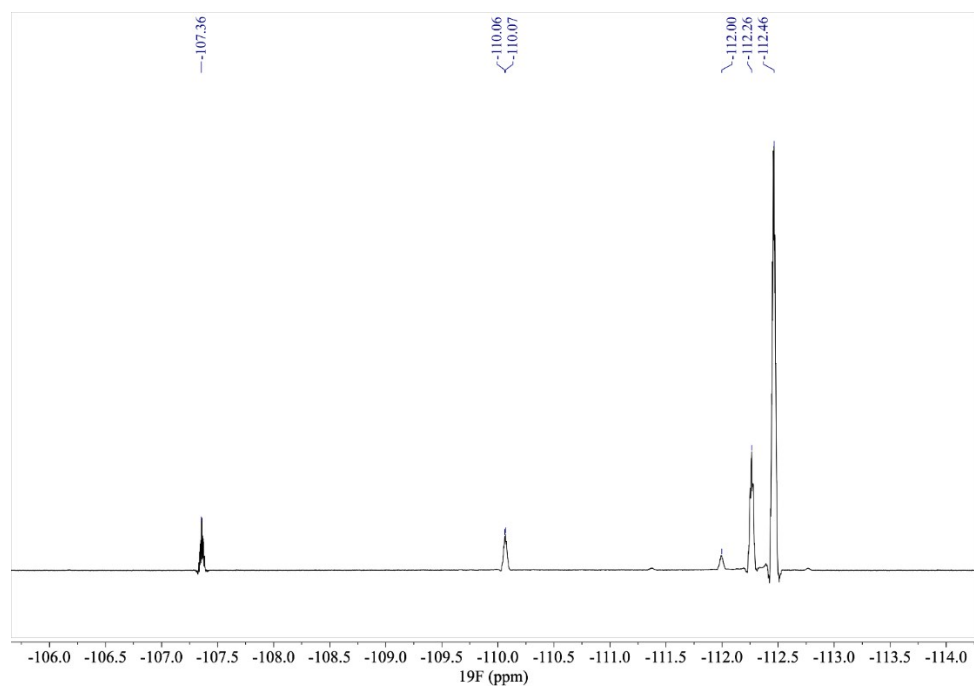

**Figure S8.  $^{31}\text{P}\{^1\text{H}\}$  NMR spectrum of the isolated complex**

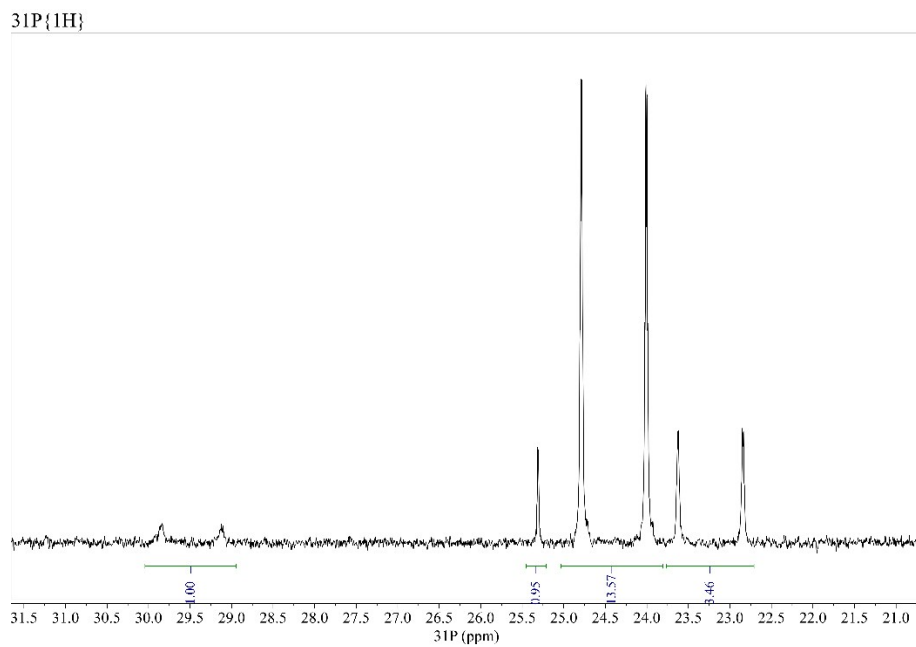

**Figure S9. Full  $^{31}\text{P}$ - $^{103}\text{Rh}\{^1\text{H}, ^{103}\text{Rh}\}$  HMQC spectrum**

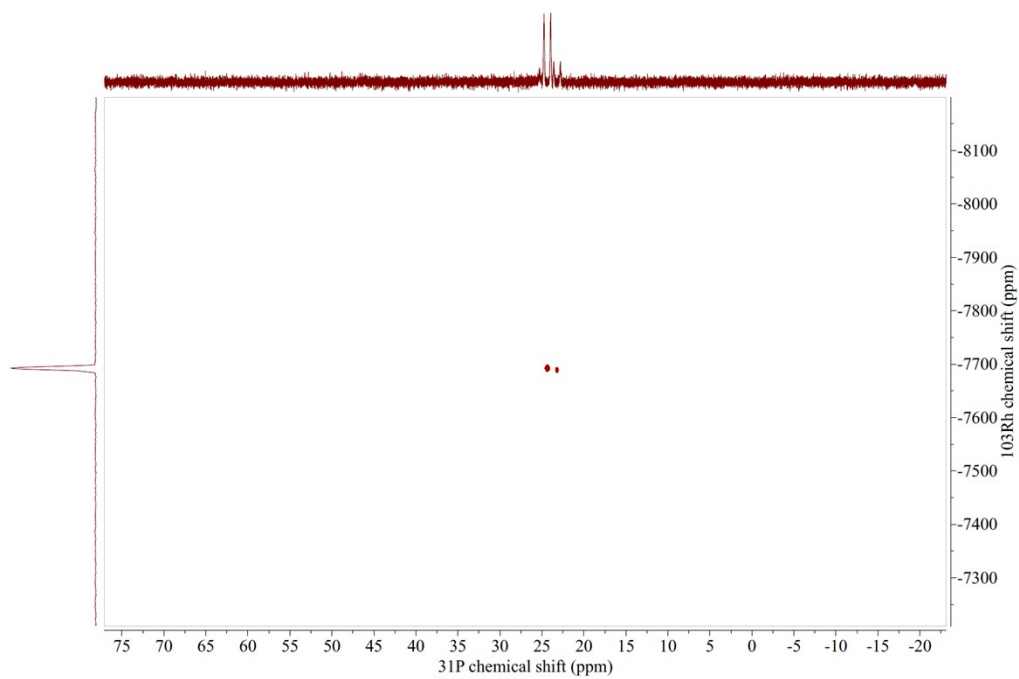

**Figure S10. COSY NMR spectrum**

COSY

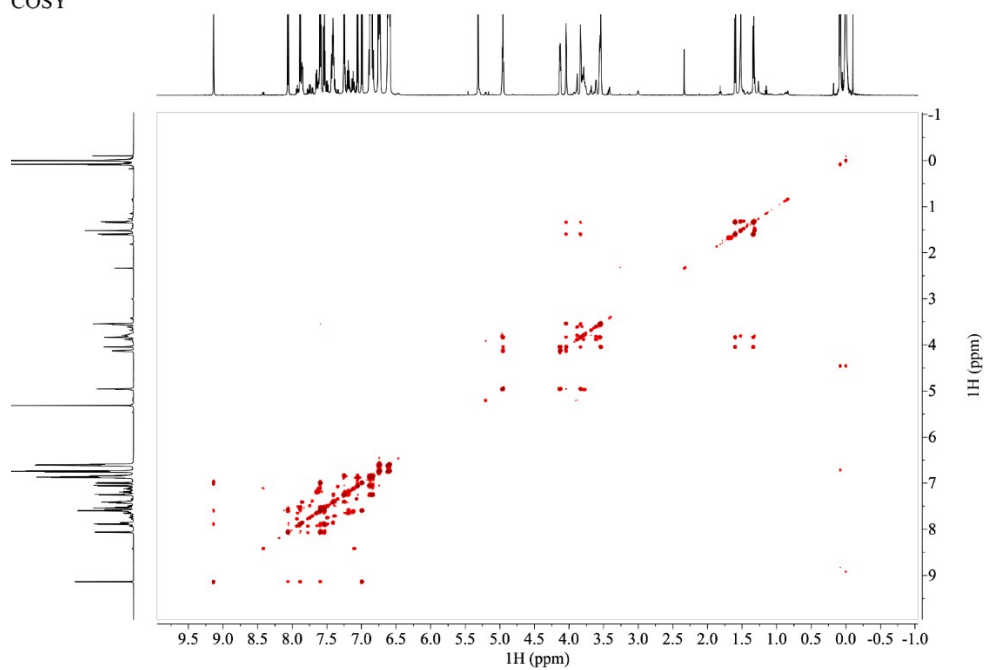

**Figure S11. COSY aromatic region**

COSY

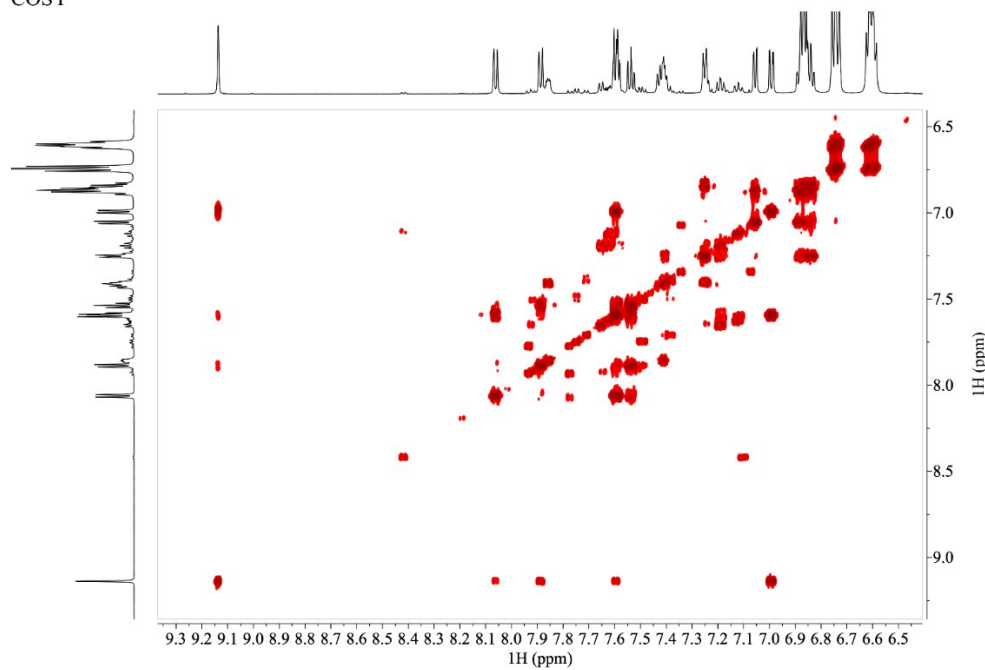

**Figure S12. H2BC NMR**

H2BC

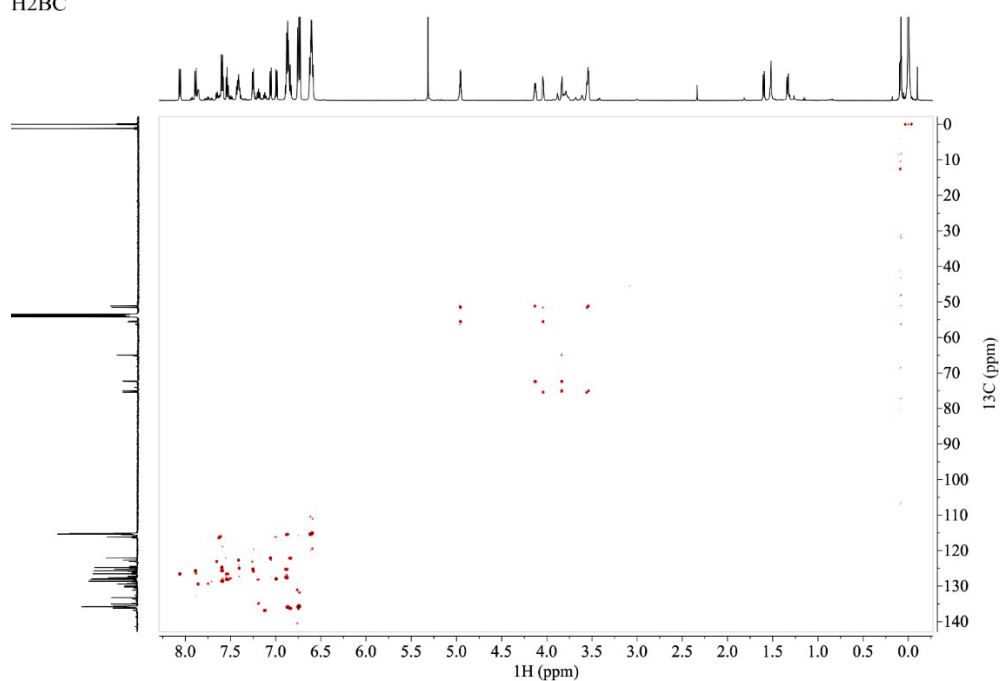

**Figure S13. Band selective HMBC**

Band selective HMBC

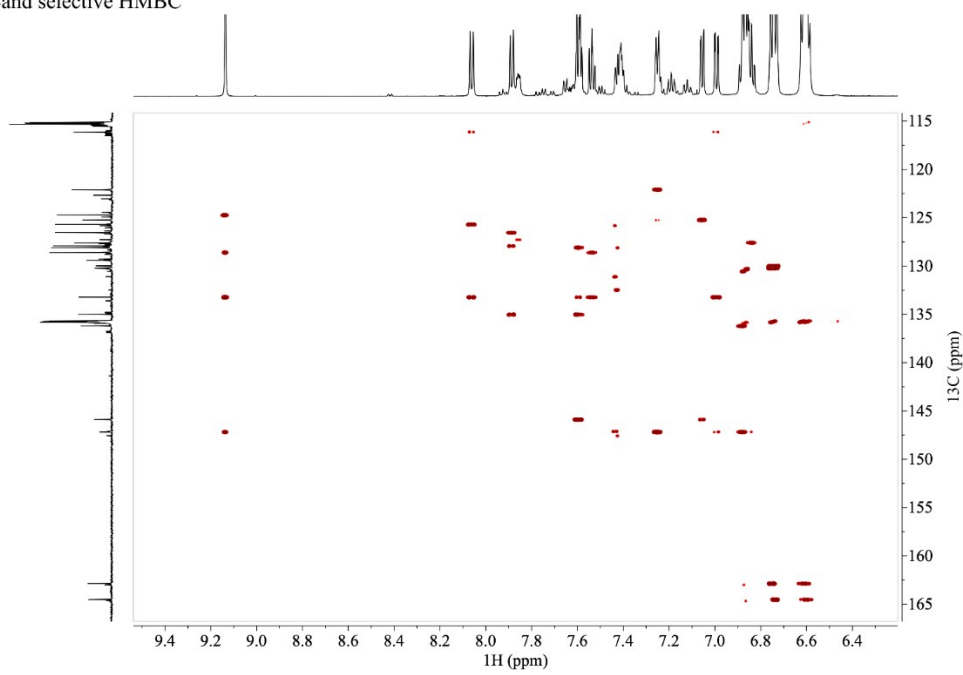

**Figure S14. HMBC NMR**

HMBC

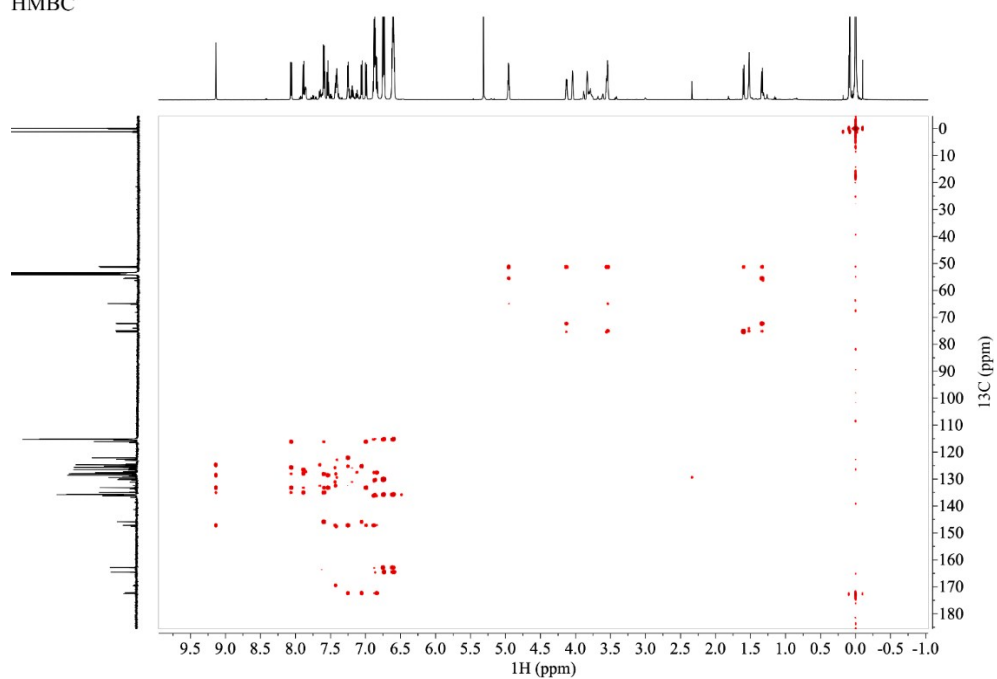

**Figure S15. HSQC NMR**

HSQC

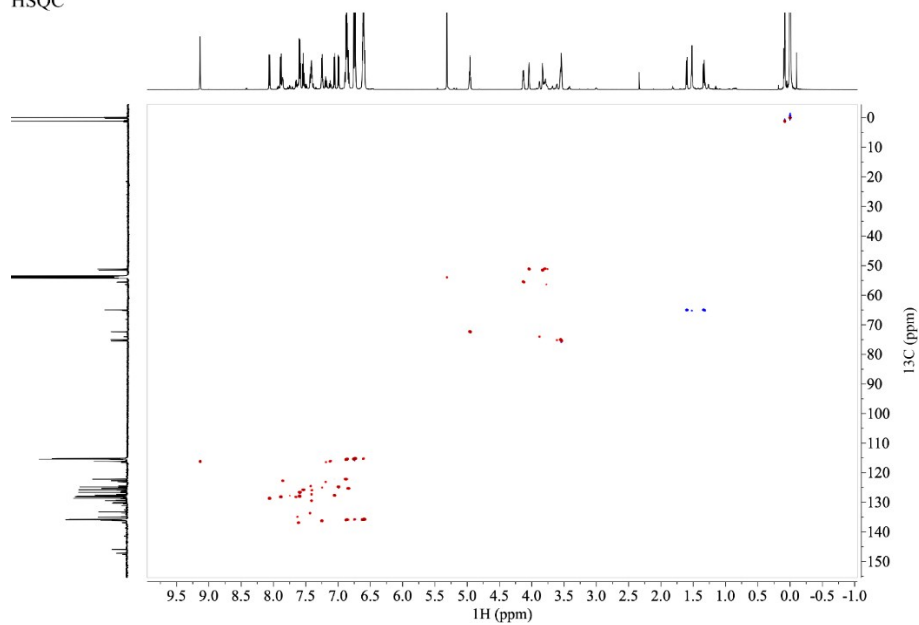

**Figure S16. HSQC aromatic**

HSQC

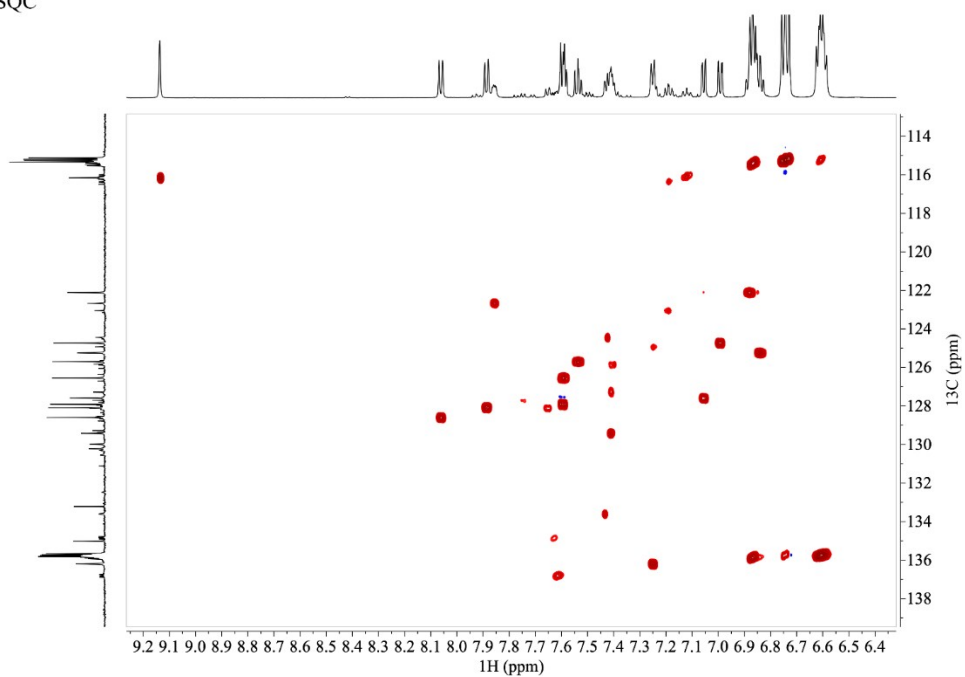

**Figure S17. NOESY NMR**

NOESY

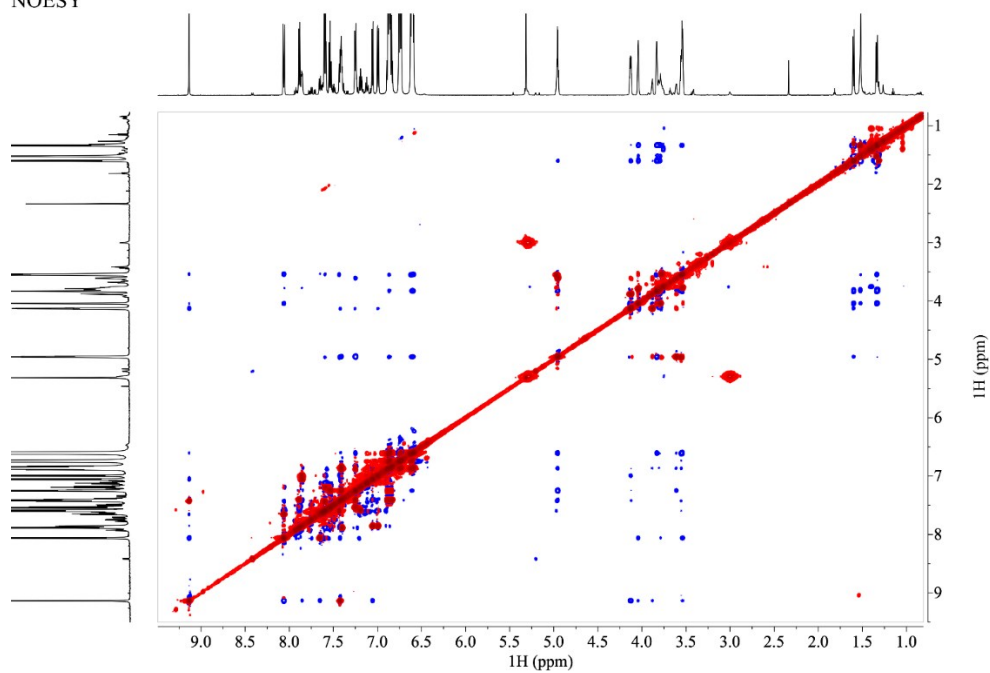

**Figure S18. NOESY NMR aromatic region**

NOESY

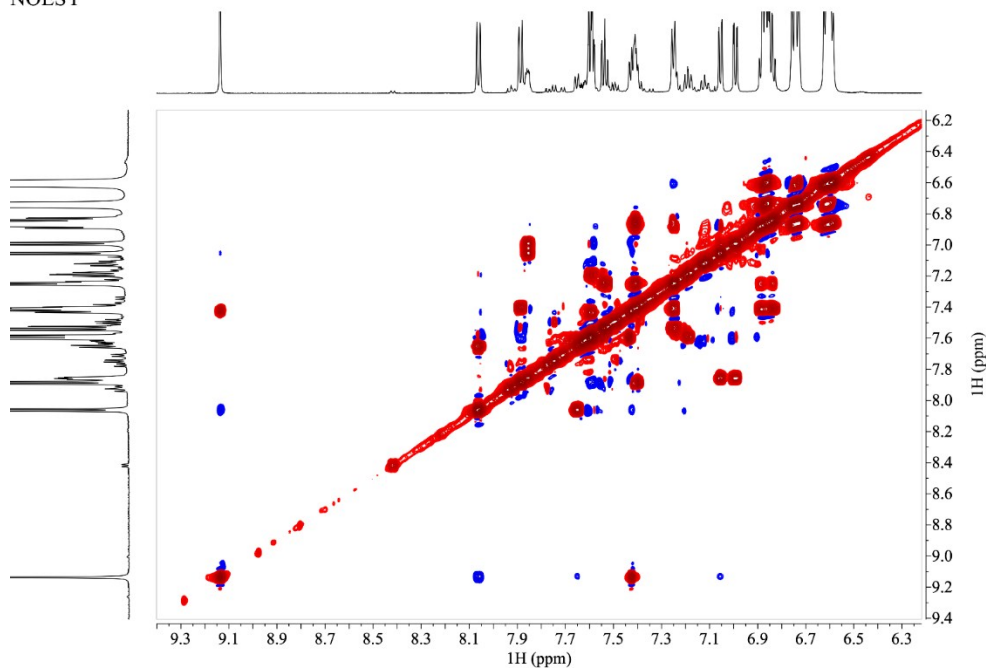

## Crystallographic data

### Experimental details

Data collection: *CrysAlis PRO* 1.171.39.46 (Rigaku OD, 2018); cell refinement: *CrysAlis PRO* 1.171.39.46 (Rigaku OD, 2018); data reduction: *CrysAlis PRO* 1.171.39.46 (Rigaku OD, 2018); program(s) used to solve structure: *SHELXT2015/1* (Sheldrick, 2015); program(s) used to refine structure: *SHELXL2018/3* (Sheldrick, 2015); molecular graphics: *X-SEED* v. 4.0 (Barbour, 2001); software used to prepare material for publication: *SHELXL2018/3* (Sheldrick, 2015).

(mxm379nt)

## Crystal data

$C_{41}H_{31}F_3PRh \cdot CH_2Cl_2$

$M_r = 799.46$

Monoclinic,  $P2_1/n$

$a = 11.7509$  (1) Å

$b = 21.0929$  (2) Å

$c = 13.9381$  (1) Å

$\beta = 96.153$  (1)°

$V = 3434.80$  (5) Å<sup>3</sup>

$Z = 4$

$F(000) = 1624$

$D_x = 1.546$  Mg m<sup>-3</sup>

Mo  $K\alpha$  radiation,  $\lambda = 0.71073$  Å

Cell parameters from 26188 reflections

$\theta = 2.4\text{--}31.6^\circ$

$\mu = 0.75$  mm<sup>-1</sup>

$T = 99$  K

Needle, yellow



0.21 ×

0.12 × 0.10 mm

## Data collection

Oxford Diffraction Xcalibur-S  
diffractometer

Radiation source: fine-focus sealed tube

Graphite monochromator

Detector resolution: 16.0009 pixels mm<sup>-1</sup>

$\omega$  scans

Absorption correction: multi-scan

*Crys.Alis PRO* 1.171.39.46 (Rigaku Oxford

Diffraction, 2018) Empirical absorption correction

using spherical harmonics, implemented in SCALE3

ABSPACK scaling algorithm.

$T_{\min} = 0.938$ ,  $T_{\max} = 1.0$

71355 measured reflections

11686 independent reflections

9483 reflections with  $I > 2\sigma(I)$

$R_{\text{int}} = 0.049$

$\theta_{\max} = 32.4^\circ$ ,  $\theta_{\min} = 2.4^\circ$

$h = -17 \rightarrow 17$

$k = -30 \rightarrow 31$

$l = -20 \rightarrow 20$

## Refinement

Refinement on  $F^2$

Least-squares matrix: full

$R[F^2 > 2\sigma(F^2)] = 0.040$

$wR(F^2) = 0.101$

$S = 1.00$

11686 reflections

442 parameters

0 restraints

Hydrogen site location: inferred from neighbouring  
sites

H-atom parameters constrained

2

$w = 1/[\sigma^2(F_o) + (0.0443P) + 4.430P]$

where  $P = (F^2 + 2F^2)/$

$(\Delta/\sigma)_{\max} = 0.002$

$\Delta\rho_{\max} = 1.02 \text{ e}$   
 $\text{\AA}^{-3}$

$\Delta\rho_{\min} = -1.11 \text{ e}$   
 $\text{\AA}^{-3}$

## Special details

*Geometry.* All e.s.d.'s (except the e.s.d. in the dihedral angle between two l.s. planes) are estimated using the full covariance matrix. The cell e.s.d.'s are taken into account individually in the estimation of e.s.d.'s in distances, angles and torsion angles; correlations between e.s.d.'s in cell parameters are only used when they are defined by crystal symmetry. An approximate (isotropic) treatment of cell e.s.d.'s is used for estimating e.s.d.'s involving l.s. planes.

## Fractional atomic coordinates and isotropic or equivalent isotropic displacement parameters (Å<sup>2</sup>)

|     | <i>x</i>     | <i>y</i>     | <i>z</i>      | $U_{\text{iso}}^*/U_{\text{eq}}$ |
|-----|--------------|--------------|---------------|----------------------------------|
| Rh1 | 0.65374 (2)  | 0.31281 (2)  | 0.41630 (2)   | 0.01530 (5)                      |
| P1  | 0.56078 (4)  | 0.25624 (2)  | 0.29092 (4)   | 0.01635 (10)                     |
| C1  | 0.59995 (17) | 0.24929 (10) | 0.51269 (14)  | 0.0176 (4)                       |
| C2  | 0.49018 (17) | 0.25691 (10) | 0.54489 (14)  | 0.0180 (4)                       |
| C3  | 0.4505 (2)   | 0.21494 (11) | 0.61217 (16)  | 0.0237 (4)                       |
| H3  | 0.377268     | 0.221331     | 0.633597      | 0.028*                           |
| C4  | 0.5178 (2)   | 0.16408 (11) | 0.64759 (17)  | 0.0264 (4)                       |
| H4  | 0.490868     | 0.135895     | 0.693305      | 0.032*                           |
| C5  | 0.6245 (2)   | 0.15478 (11) | 0.61569 (16)  | 0.0249 (4)                       |
| H5  | 0.670246     | 0.119715     | 0.638751      | 0.030*                           |
| C6  | 0.66441 (19) | 0.19675 (10) | 0.55003 (16)  | 0.0209 (4)                       |
| H6  | 0.737930     | 0.189753     | 0.529535      | 0.025*                           |
| C11 | 0.42379 (17) | 0.21655 (10) | 0.29999 (14)  | 0.0191 (4)                       |
| C12 | 0.42076 (19) | 0.16586 (11) | 0.36510 (16)  | 0.0226 (4)                       |
| H12 | 0.488787     | 0.153372     | 0.403445      | 0.027*                           |
| C13 | 0.3189 (2)   | 0.13383 (11) | 0.37384 (17)  | 0.0252 (4)                       |
| H13 | 0.316116     | 0.099556     | 0.417753      | 0.030*                           |
| F14 | 0.12261 (12) | 0.12110 (8)  | 0.32434 (11)  | 0.0333 (3)                       |
| C14 | 0.22198 (19) | 0.15335 (12) | 0.31679 (16)  | 0.0251 (4)                       |
| C15 | 0.22037 (19) | 0.20321 (12) | 0.25334 (16)  | 0.0268 (5)                       |
| H15 | 0.151592     | 0.215807     | 0.216167      | 0.032*                           |
| C16 | 0.32304 (18) | 0.23462 (12) | 0.24540 (16)  | 0.0238 (4)                       |
| H16 | 0.324325     | 0.269152     | 0.201767      | 0.029*                           |
| C21 | 0.52980 (17) | 0.30492 (10) | 0.18252 (15)  | 0.0187 (4)                       |
| C22 | 0.4793 (2)   | 0.36421 (11) | 0.19387 (16)  | 0.0247 (4)                       |
| H22 | 0.462318     | 0.376992     | 0.256137      | 0.030*                           |
| C23 | 0.4534 (2)   | 0.40475 (11) | 0.11597 (17)  | 0.0270 (5)                       |
| H23 | 0.418920     | 0.444858     | 0.124120      | 0.032*                           |
| F24 | 0.45430 (16) | 0.42402 (8)  | −0.04989 (11) | 0.0406 (4)                       |
| C24 | 0.4792 (2)   | 0.38500 (12) | 0.02639 (16)  | 0.0274 (5)                       |
| C25 | 0.5291 (2)   | 0.32696 (11) | 0.01170 (16)  | 0.0261 (4)                       |
| H25 | 0.545565     | 0.314549     | −0.050855     | 0.031*                           |
| C26 | 0.55445 (19) | 0.28721 (11) | 0.09048 (15)  | 0.0217 (4)                       |
| H26 | 0.589182     | 0.247269     | 0.081596      | 0.026*                           |
| C31 | 0.64638 (18) | 0.19081 (9)  | 0.25076 (15)  | 0.0182 (4)                       |
| C32 | 0.76368 (18) | 0.18922 (10) | 0.28100 (16)  | 0.0216 (4)                       |
| H32 | 0.796295     | 0.220748     | 0.324221      | 0.026*                           |
| C33 | 0.83358 (19) | 0.14209 (11) | 0.24874 (17)  | 0.0249 (4)                       |
| H33 | 0.913446     | 0.141357     | 0.268727      | 0.030*                           |
| F34 | 0.85091 (13) | 0.05081 (7)  | 0.15551 (11)  | 0.0320 (3)                       |
| C34 | 0.7836 (2)   | 0.09668 (10) | 0.18716 (16)  | 0.0232 (4)                       |
| C35 | 0.6677 (2)   | 0.09558 (11) | 0.15647 (16)  | 0.0250 (4)                       |
| H35 | 0.635823     | 0.063162     | 0.114544      | 0.030*                           |

|      |             |             |             |           |
|------|-------------|-------------|-------------|-----------|
| C36  | 0.59913(19) | 0.14299(10) | 0.18843(15) | 0.0218(4) |
| H36  | 0.519372    | 0.143150    | 0.167968    | 0.026*    |
| C40  | 0.41412(17) | 0.30762(10) | 0.50151(14) | 0.0178(4) |
| C41  | 0.45623(17) | 0.36581(10) | 0.47682(14) | 0.0181(4) |
| H41  | 0.534607    | 0.375361    | 0.494874    | 0.022*    |
| C42  | 0.38579(17) | 0.41177(10) | 0.42526(14) | 0.0183(4) |
| C43  | 0.42964(19) | 0.47041(10) | 0.39604(15) | 0.0216(4) |
| H43  | 0.507703    | 0.480634    | 0.414274    | 0.026*    |
| C44  | 0.3612(2)   | 0.51270(11) | 0.34182(16) | 0.0256(4) |
| H44  | 0.392218    | 0.551707    | 0.322586    | 0.031*    |
| C45  | 0.2446(2)   | 0.49842(12) | 0.31445(17) | 0.0278(5) |
| H45  | 0.197649    | 0.527627    | 0.276372    | 0.033*    |
| C46  | 0.1994(2)   | 0.44258(11) | 0.34281(16) | 0.0253(4) |
| H46  | 0.120752    | 0.433665    | 0.324750    | 0.030*    |
| C47  | 0.26779(18) | 0.39764(10) | 0.39878(15) | 0.0201(4) |
| C48  | 0.22515(18) | 0.33861(11) | 0.42745(16) | 0.0224(4) |
| H48  | 0.146385    | 0.328948    | 0.411815    | 0.027*    |
| C49  | 0.29500(18) | 0.29521(10) | 0.47719(16) | 0.0215(4) |
| H49  | 0.263770    | 0.256137    | 0.495892    | 0.026*    |
| C51  | 0.77167(18) | 0.36657(10) | 0.51706(15) | 0.0201(4) |
| H51  | 0.732766    | 0.364820    | 0.573338    | 0.024*    |
| C52  | 0.82996(18) | 0.31702(10) | 0.47667(16) | 0.0218(4) |
| H52  | 0.837093    | 0.274575    | 0.499306    | 0.026*    |
| C53  | 0.88016(18) | 0.34501(11) | 0.38829(16) | 0.0233(4) |
| H53  | 0.943886    | 0.321003    | 0.362842    | 0.028*    |
| C54  | 0.90601(19) | 0.41388(11) | 0.42278(17) | 0.0257(4) |
| H54A | 0.924924    | 0.442340    | 0.370283    | 0.031*    |
| H54B | 0.965862    | 0.416354    | 0.478324    | 0.031*    |
| C55  | 0.78355(19) | 0.42454(10) | 0.45155(15) | 0.0217(4) |
| H55  | 0.766654    | 0.467029    | 0.478513    | 0.026*    |
| C56  | 0.71247(18) | 0.40466(10) | 0.35701(15) | 0.0207(4) |
| H56  | 0.641805    | 0.422477    | 0.330380    | 0.025*    |
| C57  | 0.77140(18) | 0.35598(10) | 0.31859(15) | 0.0212(4) |
| H57  | 0.749180    | 0.333594    | 0.260447    | 0.025*    |
| C10  | 0.8416(3)   | 0.52931(14) | 0.0912(2)   | 0.0428(7) |
| H10A | 0.814706    | 0.566029    | 0.126900    | 0.051*    |
| H10B | 0.845179    | 0.542344    | 0.023410    | 0.051*    |
| Cl11 | 0.74482(8)  | 0.46634(5)  | 0.09516(8)  | 0.0637(2) |
| Cl12 | 0.97959(8)  | 0.50650(4)  | 0.14318(9)  | 0.0673(3) |

*Atomic displacement parameters ( $\text{\AA}^2$ )*

|     | $U^{11}$   | $U^{22}$   | $U^{33}$   | $U^{12}$    | $U^{13}$    | $U^{23}$     |
|-----|------------|------------|------------|-------------|-------------|--------------|
| Rh1 | 0.01395(7) | 0.01707(7) | 0.01485(7) | 0.00018(5)  | 0.00145(5)  | 0.00007(5)   |
| P1  | 0.0145(2)  | 0.0183(2)  | 0.0161(2)  | 0.00174(18) | 0.00104(17) | -0.00112(18) |
| C1  | 0.0163(9)  | 0.0187(9)  | 0.0177(9)  | -0.0012(7)  | 0.0009(7)   | -0.0013(7)   |
| C2  | 0.0177(9)  | 0.0182(9)  | 0.0181(9)  | -0.0008(7)  | 0.0014(7)   | -0.0008(7)   |
| C3  | 0.0244(10) | 0.0252(10) | 0.0221(10) | -0.0029(8)  | 0.0055(8)   | 0.0015(8)    |
| C4  | 0.0318(12) | 0.0244(10) | 0.0234(10) | -0.0023(9)  | 0.0042(9)   | 0.0064(8)    |
| C5  | 0.0281(11) | 0.0210(10) | 0.0246(10) | 0.0016(8)   | -0.0012(9)  | 0.0042(8)    |
| C6  | 0.0193(9)  | 0.0208(9)  | 0.0220(9)  | 0.0003(7)   | -0.0011(7)  | 0.0009(7)    |
| C11 | 0.0171(9)  | 0.0223(9)  | 0.0179(9)  | 0.0000(7)   | 0.0021(7)   | -0.0055(7)   |

|      |             |             |             |             |             |             |
|------|-------------|-------------|-------------|-------------|-------------|-------------|
| C12  | 0.0195 (9)  | 0.0236 (10) | 0.0244 (10) | -0.0012 (8) | 0.0011 (8)  | -0.0038 (8) |
| C13  | 0.0253 (11) | 0.0235 (10) | 0.0273 (11) | -0.0041 (8) | 0.0048 (9)  | -0.0044 (8) |
| F14  | 0.0217 (7)  | 0.0420 (8)  | 0.0375 (8)  | -0.0126 (6) | 0.0081 (6)  | -0.0133 (7) |
| C14  | 0.0175 (9)  | 0.0333 (12) | 0.0252 (10) | -0.0064 (8) | 0.0058 (8)  | -0.0121 (9) |
| C15  | 0.0177 (10) | 0.0412 (13) | 0.0209 (10) | 0.0007 (9)  | -0.0005 (8) | -0.0071 (9) |
| C16  | 0.0191 (10) | 0.0334 (11) | 0.0186 (9)  | 0.0012 (8)  | 0.0006 (7)  | -0.0021 (8) |
| C21  | 0.0166 (9)  | 0.0223 (9)  | 0.0172 (9)  | -0.0001 (7) | 0.0013 (7)  | -0.0003 (7) |
| C22  | 0.0277 (11) | 0.0253 (10) | 0.0203 (10) | 0.0063 (9)  | -0.0004 (8) | -0.0021 (8) |
| C23  | 0.0305 (12) | 0.0241 (10) | 0.0258 (11) | 0.0072 (9)  | -0.0001 (9) | 0.0004 (8)  |
| F24  | 0.0590 (11) | 0.0361 (8)  | 0.0263 (7)  | 0.0130 (8)  | 0.0032 (7)  | 0.0121 (6)  |
| C24  | 0.0302 (12) | 0.0297 (11) | 0.0219 (10) | 0.0032 (9)  | 0.0001 (9)  | 0.0073 (9)  |
| C25  | 0.0318 (12) | 0.0286 (11) | 0.0187 (10) | 0.0017 (9)  | 0.0061 (8)  | 0.0027 (8)  |
| C26  | 0.0213 (10) | 0.0231 (10) | 0.0212 (9)  | 0.0008 (8)  | 0.0041 (8)  | -0.0003 (8) |
| C31  | 0.0187 (9)  | 0.0172 (9)  | 0.0189 (9)  | 0.0011 (7)  | 0.0032 (7)  | 0.0004 (7)  |
| C32  | 0.0197 (9)  | 0.0219 (9)  | 0.0231 (10) | 0.0013 (8)  | 0.0018 (8)  | -0.0026 (8) |
| C33  | 0.0202 (10) | 0.0241 (10) | 0.0306 (11) | 0.0050 (8)  | 0.0039 (8)  | 0.0011 (9)  |
| F34  | 0.0322 (7)  | 0.0244 (7)  | 0.0412 (8)  | 0.0101 (6)  | 0.0118 (6)  | -0.0054 (6) |
| C34  | 0.0259 (10) | 0.0202 (9)  | 0.0249 (10) | 0.0074 (8)  | 0.0087 (8)  | -0.0003 (8) |
| C35  | 0.0309 (11) | 0.0194 (10) | 0.0248 (10) | 0.0018 (8)  | 0.0040 (9)  | -0.0038 (8) |
| C36  | 0.0201 (9)  | 0.0226 (10) | 0.0221 (10) | 0.0005 (8)  | 0.0000 (8)  | -0.0017 (8) |
| C40  | 0.0160 (8)  | 0.0206 (9)  | 0.0172 (8)  | 0.0005 (7)  | 0.0038 (7)  | -0.0021 (7) |
| C41  | 0.0156 (8)  | 0.0206 (9)  | 0.0183 (9)  | 0.0003 (7)  | 0.0029 (7)  | -0.0014 (7) |
| C42  | 0.0174 (9)  | 0.0206 (9)  | 0.0174 (9)  | 0.0021 (7)  | 0.0030 (7)  | -0.0020 (7) |
| C43  | 0.0213 (10) | 0.0215 (10) | 0.0225 (10) | 0.0017 (8)  | 0.0053 (8)  | 0.0001 (8)  |
| C44  | 0.0307 (11) | 0.0226 (10) | 0.0245 (10) | 0.0028 (9)  | 0.0067 (9)  | 0.0018 (8)  |
| C45  | 0.0309 (12) | 0.0283 (11) | 0.0232 (10) | 0.0093 (9)  | -0.0014 (9) | 0.0007 (9)  |
| C46  | 0.0214 (10) | 0.0284 (11) | 0.0251 (10) | 0.0042 (8)  | -0.0024 (8) | -0.0040 (9) |
| C47  | 0.0174 (9)  | 0.0226 (10) | 0.0202 (9)  | 0.0027 (7)  | 0.0015 (7)  | -0.0033 (7) |
| C48  | 0.0148 (9)  | 0.0247 (10) | 0.0278 (10) | -0.0015 (8) | 0.0028 (8)  | -0.0052 (8) |
| C49  | 0.0184 (9)  | 0.0201 (9)  | 0.0267 (10) | -0.0022 (7) | 0.0058 (8)  | -0.0035 (8) |
| C51  | 0.0171 (9)  | 0.0227 (9)  | 0.0199 (9)  | -0.0039 (7) | -0.0003 (7) | -0.0002 (7) |
| C52  | 0.0174 (9)  | 0.0228 (10) | 0.0248 (10) | -0.0012 (8) | 0.0003 (8)  | 0.0023 (8)  |
| C53  | 0.0163 (9)  | 0.0264 (10) | 0.0278 (11) | 0.0003 (8)  | 0.0048 (8)  | 0.0002 (8)  |
| C54  | 0.0200 (10) | 0.0286 (11) | 0.0287 (11) | -0.0049 (8) | 0.0031 (8)  | 0.0013 (9)  |
| C55  | 0.0217 (10) | 0.0217 (10) | 0.0221 (10) | -0.0023 (8) | 0.0036 (8)  | -0.0001 (8) |
| C56  | 0.0200 (9)  | 0.0232 (10) | 0.0194 (9)  | 0.0002 (8)  | 0.0040 (7)  | 0.0043 (7)  |
| C57  | 0.0199 (9)  | 0.0241 (10) | 0.0204 (9)  | -0.0030 (8) | 0.0054 (7)  | 0.0005 (8)  |
| C10  | 0.0494 (17) | 0.0337 (14) | 0.0451 (16) | 0.0062 (12) | 0.0044 (13) | 0.0017 (12) |
| Cl11 | 0.0407 (4)  | 0.0554 (5)  | 0.0948 (7)  | -0.0023 (4) | 0.0052 (4)  | -0.0001 (5) |
| Cl12 | 0.0463 (5)  | 0.0349 (4)  | 0.1167 (9)  | -0.0010 (3) | -0.0102 (5) | -0.0025 (5) |

---

*Geometric parameters (Å, °)*

|         |            |         |           |
|---------|------------|---------|-----------|
| Rh1—C1  | 2.045 (2)  | C33—C34 | 1.375 (3) |
| Rh1—C52 | 2.152 (2)  | C33—H33 | 0.9500    |
| Rh1—C51 | 2.182 (2)  | F34—C34 | 1.354 (2) |
| Rh1—C57 | 2.236 (2)  | C34—C35 | 1.383 (3) |
| Rh1—C56 | 2.244 (2)  | C35—C36 | 1.387 (3) |
| Rh1—P1  | 2.2938 (5) | C35—H35 | 0.9500    |
| P1—C31  | 1.830 (2)  | C36—H36 | 0.9500    |
| P1—C11  | 1.831 (2)  | C40—C41 | 1.381 (3) |
| P1—C21  | 1.831 (2)  | C40—C49 | 1.429 (3) |

|             |            |             |             |
|-------------|------------|-------------|-------------|
| C1—C6       | 1.410 (3)  | C41—C42     | 1.419 (3)   |
| C1—C2       | 1.419 (3)  | C41—H41     | 0.9500      |
| C2—C3       | 1.405 (3)  | C42—C43     | 1.417 (3)   |
| C2—C40      | 1.481 (3)  | C42—C47     | 1.428 (3)   |
| C3—C4       | 1.392 (3)  | C43—C44     | 1.373 (3)   |
| C3—H3       | 0.9500     | C43—H43     | 0.9500      |
| C4—C5       | 1.389 (3)  | C44—C45     | 1.415 (3)   |
| C4—H4       | 0.9500     | C44—H44     | 0.9500      |
| C5—C6       | 1.391 (3)  | C45—C46     | 1.368 (3)   |
| C5—H5       | 0.9500     | C45—H45     | 0.9500      |
| C6—H6       | 0.9500     | C46—C47     | 1.421 (3)   |
| C11—C16     | 1.390 (3)  | C46—H46     | 0.9500      |
| C11—C12     | 1.405 (3)  | C47—C48     | 1.415 (3)   |
| C12—C13     | 1.391 (3)  | C48—C49     | 1.368 (3)   |
| C12—H12     | 0.9500     | C48—H48     | 0.9500      |
| C13—C14     | 1.380 (3)  | C49—H49     | 0.9500      |
| C13—H13     | 0.9500     | C51—C52     | 1.400 (3)   |
| F14—C14     | 1.365 (3)  | C51—C55     | 1.541 (3)   |
| C14—C15     | 1.373 (4)  | C51—H51     | 0.9500      |
| C15—C16     | 1.391 (3)  | C52—C53     | 1.539 (3)   |
| C15—H15     | 0.9500     | C52—H52     | 0.9500      |
| C16—H16     | 0.9500     | C53—C57     | 1.538 (3)   |
| C21—C26     | 1.396 (3)  | C53—C54     | 1.550 (3)   |
| C21—C22     | 1.401 (3)  | C53—H53     | 1.0000      |
| C22—C23     | 1.390 (3)  | C54—C55     | 1.551 (3)   |
| C22—H22     | 0.9500     | C54—H54A    | 0.9900      |
| C23—C24     | 1.381 (3)  | C54—H54B    | 0.9900      |
| C23—H23     | 0.9500     | C55—C56     | 1.541 (3)   |
| F24—C24     | 1.352 (3)  | C55—H55     | 1.0000      |
| C24—C25     | 1.382 (3)  | C56—C57     | 1.378 (3)   |
| C25—C26     | 1.388 (3)  | C56—H56     | 0.9500      |
| C25—H25     | 0.9500     | C57—H57     | 0.9500      |
| C26—H26     | 0.9500     | C10—C11     | 1.753 (3)   |
| C31—C32     | 1.398 (3)  | C10—C12     | 1.770 (3)   |
| C31—C36     | 1.406 (3)  | C10—H10A    | 0.9900      |
| C32—C33     | 1.394 (3)  | C10—H10B    | 0.9900      |
| C32—H32     | 0.9500     |             |             |
|             |            |             |             |
| C1—Rh1—C52  | 97.03 (8)  | C33—C34—C35 | 123.1 (2)   |
| C1—Rh1—C51  | 97.89 (8)  | C34—C35—C36 | 118.4 (2)   |
| C52—Rh1—C51 | 37.70 (8)  | C34—C35—H35 | 120.8       |
| C1—Rh1—C57  | 157.20 (8) | C36—C35—H35 | 120.8       |
| C52—Rh1—C57 | 65.76 (8)  | C35—C36—C31 | 120.7 (2)   |
| C51—Rh1—C57 | 77.81 (8)  | C35—C36—H36 | 119.6       |
| C1—Rh1—C56  | 159.49 (8) | C31—C36—H36 | 119.6       |
| C52—Rh1—C56 | 77.72 (8)  | C41—C40—C49 | 118.16 (19) |
| C51—Rh1—C56 | 65.74 (8)  | C41—C40—C2  | 121.82 (18) |
| C57—Rh1—C56 | 35.84 (8)  | C49—C40—C2  | 119.85 (18) |
| C1—Rh1—P1   | 90.24 (6)  | C40—C41—C42 | 121.90 (19) |
| C52—Rh1—P1  | 132.78 (6) | C40—C41—H41 | 119.1       |
| C51—Rh1—P1  | 168.06 (6) | C42—C41—H41 | 119.1       |
| C57—Rh1—P1  | 91.31 (6)  | C43—C42—C41 | 122.12 (19) |

|             |             |               |             |
|-------------|-------------|---------------|-------------|
| C56—Rh1—P1  | 107.98 (6)  | C43—C42—C47   | 118.76 (19) |
| C31—P1—C11  | 101.09 (9)  | C41—C42—C47   | 119.08 (19) |
| C31—P1—C21  | 103.75 (9)  | C44—C43—C42   | 121.1 (2)   |
| C11—P1—C21  | 102.41 (10) | C44—C43—H43   | 119.5       |
| C31—P1—Rh1  | 113.13 (7)  | C42—C43—H43   | 119.5       |
| C11—P1—Rh1  | 122.39 (7)  | C43—C44—C45   | 120.2 (2)   |
| C21—P1—Rh1  | 111.92 (7)  | C43—C44—H44   | 119.9       |
| C6—C1—C2    | 116.28 (18) | C45—C44—H44   | 119.9       |
| C6—C1—Rh1   | 124.45 (15) | C46—C45—C44   | 120.0 (2)   |
| C2—C1—Rh1   | 119.26 (15) | C46—C45—H45   | 120.0       |
| C3—C2—C1    | 121.17 (19) | C44—C45—H45   | 120.0       |
| C3—C2—C40   | 119.90 (19) | C45—C46—C47   | 121.3 (2)   |
| C1—C2—C40   | 118.81 (18) | C45—C46—H46   | 119.4       |
| C4—C3—C2    | 120.4 (2)   | C47—C46—H46   | 119.4       |
| C4—C3—H3    | 119.8       | C48—C47—C46   | 123.0 (2)   |
| C2—C3—H3    | 119.8       | C48—C47—C42   | 118.29 (19) |
| C5—C4—C3    | 119.6 (2)   | C46—C47—C42   | 118.6 (2)   |
| C5—C4—H4    | 120.2       | C49—C48—C47   | 121.4 (2)   |
| C3—C4—H4    | 120.2       | C49—C48—H48   | 119.3       |
| C4—C5—C6    | 120.1 (2)   | C47—C48—H48   | 119.3       |
| C4—C5—H5    | 120.0       | C48—C49—C40   | 121.1 (2)   |
| C6—C5—H5    | 120.0       | C48—C49—H49   | 119.4       |
| C5—C6—C1    | 122.5 (2)   | C40—C49—H49   | 119.4       |
| C5—C6—H6    | 118.7       | C52—C51—C55   | 105.94 (18) |
| C1—C6—H6    | 118.7       | C52—C51—Rh1   | 69.98 (12)  |
| C16—C11—C12 | 118.9 (2)   | C55—C51—Rh1   | 97.04 (13)  |
| C16—C11—P1  | 122.70 (17) | C52—C51—H51   | 127.0       |
| C12—C11—P1  | 118.42 (16) | C55—C51—H51   | 127.0       |
| C13—C12—C11 | 120.5 (2)   | Rh1—C51—H51   | 100.5       |
| C13—C12—H12 | 119.7       | C51—C52—C53   | 106.34 (18) |
| C11—C12—H12 | 119.7       | C51—C52—Rh1   | 72.33 (12)  |
| C14—C13—C12 | 118.0 (2)   | C53—C52—Rh1   | 97.94 (13)  |
| C14—C13—H13 | 121.0       | C51—C52—H52   | 126.8       |
| C12—C13—H13 | 121.0       | C53—C52—H52   | 126.8       |
| F14—C14—C15 | 118.6 (2)   | Rh1—C52—H52   | 97.9        |
| F14—C14—C13 | 117.8 (2)   | C57—C53—C52   | 101.50 (16) |
| C15—C14—C13 | 123.6 (2)   | C57—C53—C54   | 100.19 (18) |
| C14—C15—C16 | 117.6 (2)   | C52—C53—C54   | 100.98 (18) |
| C14—C15—H15 | 121.2       | C57—C53—H53   | 117.1       |
| C16—C15—H15 | 121.2       | C52—C53—H53   | 117.1       |
| C11—C16—C15 | 121.4 (2)   | C54—C53—H53   | 117.1       |
| C11—C16—H16 | 119.3       | C53—C54—C55   | 93.42 (16)  |
| C15—C16—H16 | 119.3       | C53—C54—H54A  | 113.0       |
| C26—C21—C22 | 118.36 (19) | C55—C54—H54A  | 113.0       |
| C26—C21—P1  | 124.46 (16) | C53—C54—H54B  | 113.0       |
| C22—C21—P1  | 117.18 (16) | C55—C54—H54B  | 113.0       |
| C23—C22—C21 | 121.4 (2)   | H54A—C54—H54B | 110.4       |
| C23—C22—H22 | 119.3       | C56—C55—C51   | 102.45 (17) |
| C21—C22—H22 | 119.3       | C56—C55—C54   | 99.92 (17)  |
| C24—C23—C22 | 118.0 (2)   | C51—C55—C54   | 100.58 (17) |
| C24—C23—H23 | 121.0       | C56—C55—H55   | 117.0       |
| C22—C23—H23 | 121.0       | C51—C55—H55   | 117.0       |

|                 |              |                 |              |
|-----------------|--------------|-----------------|--------------|
| F24—C24—C23     | 118.5 (2)    | C54—C55—H55     | 117.0        |
| F24—C24—C25     | 118.8 (2)    | C57—C56—C55     | 106.63 (18)  |
| C23—C24—C25     | 122.6 (2)    | C57—C56—Rh1     | 71.77 (12)   |
| C24—C25—C26     | 118.4 (2)    | C55—C56—Rh1     | 94.58 (12)   |
| C24—C25—H25     | 120.8        | C57—C56—H56     | 126.7        |
| C26—C25—H25     | 120.8        | C55—C56—H56     | 126.7        |
| C25—C26—C21     | 121.1 (2)    | Rh1—C56—H56     | 101.2        |
| C25—C26—H26     | 119.4        | C56—C57—C53     | 106.54 (19)  |
| C21—C26—H26     | 119.4        | C56—C57—Rh1     | 72.39 (12)   |
| C32—C31—C36     | 118.71 (19)  | C53—C57—Rh1     | 94.60 (13)   |
| C32—C31—P1      | 118.84 (16)  | C56—C57—H57     | 126.7        |
| C36—C31—P1      | 122.43 (16)  | C53—C57—H57     | 126.7        |
| C33—C32—C31     | 121.0 (2)    | Rh1—C57—H57     | 100.7        |
| C33—C32—H32     | 119.5        | Cl11—C10—Cl12   | 110.50 (17)  |
| C31—C32—H32     | 119.5        | Cl11—C10—H10A   | 109.5        |
| C34—C33—C32     | 118.1 (2)    | Cl12—C10—H10A   | 109.5        |
| C34—C33—H33     | 121.0        | Cl11—C10—H10B   | 109.5        |
| C32—C33—H33     | 121.0        | Cl12—C10—H10B   | 109.5        |
| F34—C34—C33     | 118.4 (2)    | H10A—C10—H10B   | 108.1        |
| F34—C34—C35     | 118.5 (2)    |                 |              |
|                 |              |                 |              |
| C6—C1—C2—C3     | 1.6 (3)      | C33—C34—C35—C36 | 0.8 (4)      |
| Rh1—C1—C2—C3    | -179.04 (16) | C34—C35—C36—C31 | -0.2 (3)     |
| C6—C1—C2—C40    | -174.40 (18) | C32—C31—C36—C35 | -0.8 (3)     |
| Rh1—C1—C2—C40   | 5.0 (2)      | P1—C31—C36—C35  | 177.37 (17)  |
| C1—C2—C3—C4     | -1.1 (3)     | C3—C2—C40—C41   | 146.9 (2)    |
| C40—C2—C3—C4    | 174.9 (2)    | C1—C2—C40—C41   | -37.1 (3)    |
| C2—C3—C4—C5     | -0.3 (4)     | C3—C2—C40—C49   | -38.0 (3)    |
| C3—C4—C5—C6     | 1.1 (4)      | C1—C2—C40—C49   | 138.0 (2)    |
| C4—C5—C6—C1     | -0.5 (3)     | C49—C40—C41—C42 | -2.5 (3)     |
| C2—C1—C6—C5     | -0.8 (3)     | C2—C40—C41—C42  | 172.60 (19)  |
| Rh1—C1—C6—C5    | 179.87 (17)  | C40—C41—C42—C43 | -177.15 (19) |
| C31—P1—C11—C16  | -118.90 (18) | C40—C41—C42—C47 | 0.5 (3)      |
| C21—P1—C11—C16  | -12.0 (2)    | C41—C42—C43—C44 | 176.5 (2)    |
| Rh1—P1—C11—C16  | 114.34 (17)  | C47—C42—C43—C44 | -1.1 (3)     |
| C31—P1—C11—C12  | 61.27 (18)   | C42—C43—C44—C45 | 0.3 (3)      |
| C21—P1—C11—C12  | 168.20 (16)  | C43—C44—C45—C46 | 0.6 (3)      |
| Rh1—P1—C11—C12  | -65.48 (18)  | C44—C45—C46—C47 | -0.8 (3)     |
| Cl6—C11—C12—C13 | 0.8 (3)      | C45—C46—C47—C48 | -178.3 (2)   |
| P1—C11—C12—C13  | -179.37 (17) | C45—C46—C47—C42 | 0.0 (3)      |
| C11—C12—C13—C14 | 0.1 (3)      | C43—C42—C47—C48 | 179.32 (19)  |
| C12—C13—C14—F14 | 178.89 (19)  | C41—C42—C47—C48 | 1.6 (3)      |
| C12—C13—C14—C15 | -1.2 (3)     | C43—C42—C47—C46 | 1.0 (3)      |
| F14—C14—C15—C16 | -178.77 (19) | C41—C42—C47—C46 | -176.75 (19) |
| C13—C14—C15—C16 | 1.3 (3)      | C46—C47—C48—C49 | 176.7 (2)    |
| C12—C11—C16—C15 | -0.7 (3)     | C42—C47—C48—C49 | -1.6 (3)     |
| P1—C11—C16—C15  | 179.49 (17)  | C47—C48—C49—C40 | -0.5 (3)     |
| C14—C15—C16—C11 | -0.3 (3)     | C41—C40—C49—C48 | 2.6 (3)      |
| C31—P1—C21—C26  | 8.5 (2)      | C2—C40—C49—C48  | -172.7 (2)   |
| C11—P1—C21—C26  | -96.41 (19)  | C55—C51—C52—C53 | 1.5 (2)      |
| Rh1—P1—C21—C26  | 130.75 (17)  | Rh1—C51—C52—C53 | 93.31 (15)   |
| C31—P1—C21—C22  | -170.69 (17) | C55—C51—C52—Rh1 | -91.81 (14)  |

|                 |              |                 |              |
|-----------------|--------------|-----------------|--------------|
| C11—P1—C21—C22  | 84.44 (18)   | C51—C52—C53—C57 | -69.9 (2)    |
| Rh1—P1—C21—C22  | -48.40 (18)  | Rh1—C52—C53—C57 | 3.95 (17)    |
| C26—C21—C22—C23 | 0.3 (3)      | C51—C52—C53—C54 | 33.0 (2)     |
| P1—C21—C22—C23  | 179.48 (19)  | Rh1—C52—C53—C54 | 106.86 (15)  |
| C21—C22—C23—C24 | -0.2 (4)     | C57—C53—C54—C55 | 52.34 (18)   |
| C22—C23—C24—F24 | 179.9 (2)    | C52—C53—C54—C55 | -51.62 (19)  |
| C22—C23—C24—C25 | 0.2 (4)      | C52—C51—C55—C56 | 67.3 (2)     |
| F24—C24—C25—C26 | 180.0 (2)    | Rh1—C51—C55—C56 | -3.84 (16)   |
| C23—C24—C25—C26 | -0.3 (4)     | C52—C51—C55—C54 | -35.5 (2)    |
| C24—C25—C26—C21 | 0.4 (4)      | Rh1—C51—C55—C54 | -106.59 (14) |
| C22—C21—C26—C25 | -0.4 (3)     | C53—C54—C55—C56 | -52.33 (19)  |
| P1—C21—C26—C25  | -179.55 (18) | C53—C54—C55—C51 | 52.46 (18)   |
| C11—P1—C31—C32  | -147.03 (17) | C51—C55—C56—C57 | -68.6 (2)    |
| C21—P1—C31—C32  | 107.10 (18)  | C54—C55—C56—C57 | 34.7 (2)     |
| Rh1—P1—C31—C32  | -14.40 (19)  | C51—C55—C56—Rh1 | 3.71 (16)    |
| C11—P1—C31—C36  | 34.8 (2)     | C54—C55—C56—Rh1 | 106.98 (14)  |
| C21—P1—C31—C36  | -71.11 (19)  | C55—C56—C57—C53 | -0.2 (2)     |
| Rh1—P1—C31—C36  | 167.40 (15)  | Rh1—C56—C57—C53 | -89.63 (14)  |
| C36—C31—C32—C33 | 1.4 (3)      | C55—C56—C57—Rh1 | 89.39 (14)   |
| P1—C31—C32—C33  | -176.92 (17) | C52—C53—C57—C56 | 69.2 (2)     |
| C31—C32—C33—C34 | -0.8 (3)     | C54—C53—C57—C56 | -34.3 (2)    |
| C32—C33—C34—F34 | 180.0 (2)    | C52—C53—C57—Rh1 | -3.78 (16)   |
| C32—C33—C34—C35 | -0.3 (3)     | C54—C53—C57—Rh1 | -107.32 (14) |
| F34—C34—C35—C36 | -179.5 (2)   |                 |              |

*Hydrogen-bond geometry (Å, °)*

| <i>D</i> —H··· <i>A</i>     | <i>D</i> —H | H··· <i>A</i> | <i>D</i> ··· <i>A</i> | <i>D</i> —H··· <i>A</i> |
|-----------------------------|-------------|---------------|-----------------------|-------------------------|
| C25—H25···F14 <sup>i</sup>  | 0.95        | 2.45          | 3.137 (3)             | 129                     |
| C33—H33···F14 <sup>ii</sup> | 0.95        | 2.53          | 3.475 (3)             | 171                     |

Symmetry codes: (i)  $x+1/2, -y+1/2, z-1/2$ ; (ii)  $x+1, y, z$ .



## Shape analysis

Geometrical parameters for relevant examples of  $\text{Rh(L)(nbd)PR}_3$  complexes were calculated. The analysis was carried out considering the degree of distortion with respect to square planar and tetrahedral geometries using software developed by Alvarez et al.<sup>6</sup> that allows a mathematical calculation of continuous shape measures (CShM)<sup>7</sup> relative to the ideal geometries. The centroids of the double bonds of nbd were used in this calculation, along with the coordinated P and C atoms.

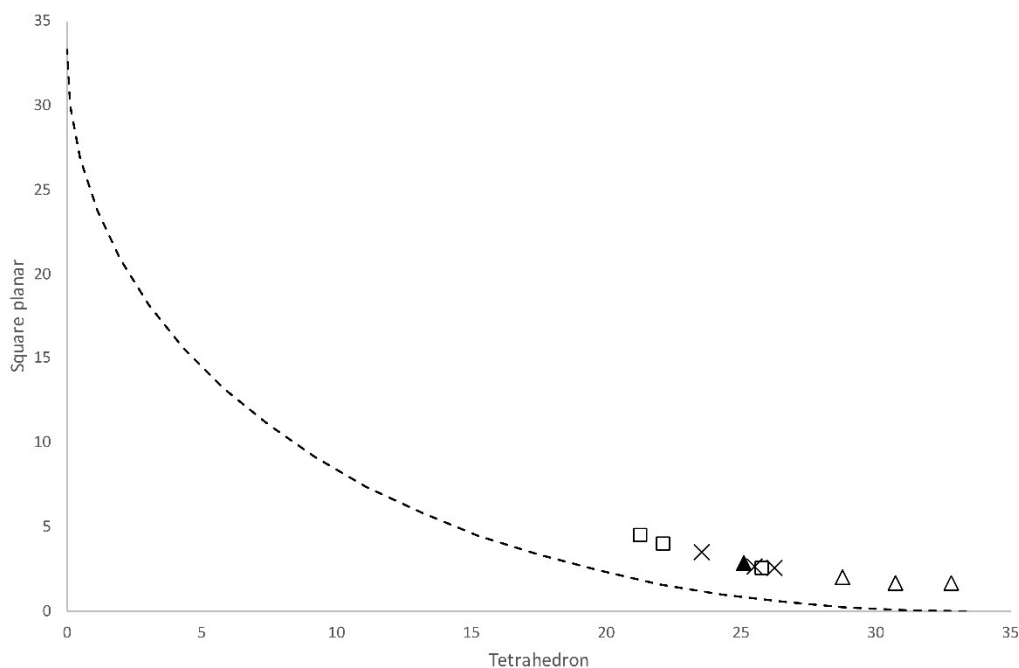

**Figure S19.** Plot of the geometrical parameters for the coordination sphere of the  $\text{Rh(L)(nbd)PR}_3$  complexes, where L is a phenyl derivative (triangles, solid triangle is **(2)**), triphenylvinyl (squares), or  $\alpha$ -phenylvinylfluorenyl (crosses), with respect to the ideal square planar and tetrahedral geometries.

**Table 2.-** CShM values of Rh(L)(nbd)PR<sub>3</sub> complexes against the reference tetrahedral and square planar geometries.

| Complex                                                                             | CSD Refcode | Reference              | Tetrahedral | Square Planar |
|-------------------------------------------------------------------------------------|-------------|------------------------|-------------|---------------|
| L = Phenyl derivative                                                               |             |                        |             |               |
| <b>(2)</b>                                                                          | –           | This work              | 25.047      | 2.952         |
| [Rh(2-Me-1-Naph)(nbd)PPh <sub>3</sub> ]                                             | LEDSIX      | 10.1021/om0509692      | 30.697      | 1.723         |
| [Rh( <i>m</i> -Xylene)(nbd)PPh <sub>3</sub> ]                                       | QEMTEH      | 10.1021/om0005809      | 32.761      | 1.744         |
| [Rh(C <sub>6</sub> F <sub>5</sub> )(nbd)PCy <sub>3</sub> ]                          | RUPYAE      | 10.1039/C5DT01981H     | 28.736      | 2.091         |
| L = $\alpha$ -phenylvinylfluorenyl                                                  |             |                        |             |               |
| <b>II</b> - [Rh(L)(nbd)P(4-FC <sub>6</sub> H <sub>4</sub> ) <sub>3</sub> ]          | XITVAA      | 10.1002/ejic.201801411 | 26.231      | 2.555         |
| [Rh(L)(nbd)P(4-(CF <sub>3</sub> )C <sub>6</sub> H <sub>4</sub> ) <sub>3</sub> ]     | XITVEE      | 10.1002/ejic.201801411 | 25.518      | 2.664         |
| [Rh(L)(nbd)P(3,5-(CF <sub>3</sub> )C <sub>6</sub> H <sub>3</sub> ) <sub>3</sub> ]   | XITTUS      | 10.1002/ejic.201801411 | 23.556      | 3.527         |
| L = triphenylvinyl                                                                  |             |                        |             |               |
| [[Rh(CPh=CPh <sub>2</sub> )(nbd)-(CH <sub>2</sub> ) <sub>4</sub> PPh <sub>2</sub> ] | HEZBAR      | 10.1021/om301147n      | 25.763      | 2.552         |
| [Rh(CPh=CPh <sub>2</sub> )(nbd)PPh <sub>3</sub> ]                                   | QIDCEN      | 10.1021/om300642b      | 22.125      | 4.015         |
| [Rh(CPh=CPh <sub>2</sub> )(nbd)P(4-ClC <sub>6</sub> H <sub>4</sub> ) <sub>3</sub> ] | PERHEC      | 10.1021/ma000497x      | 21.23       | 4.519         |

**Figure S20.** DFT Calculations at the D3-(RI)-pbe0/def2-TZVPP//bp86/sv(p) level with COSMO solvent correction in CH<sub>2</sub>Cl<sub>2</sub>. Energies are Free Energies at 298 K in kJ mol<sup>-1</sup>.

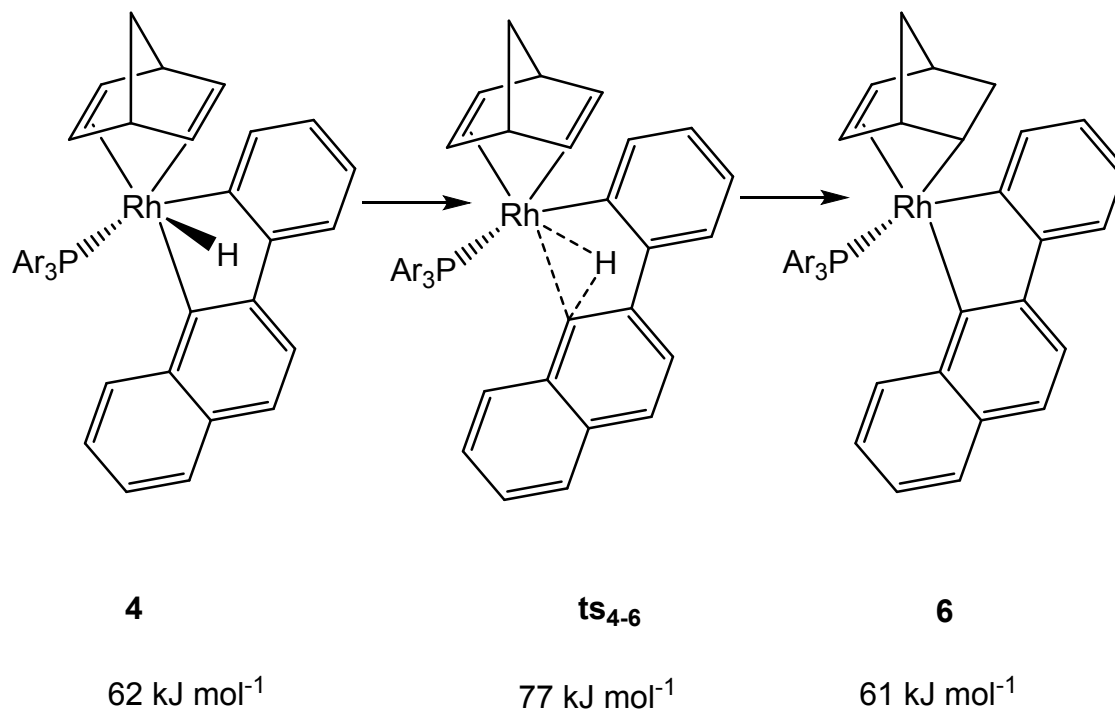

**Figure S21.** Kinetic data for the homopolymerization of PA with (2) for a target MW of 5k at [P]/[Rh] 10 and 20.

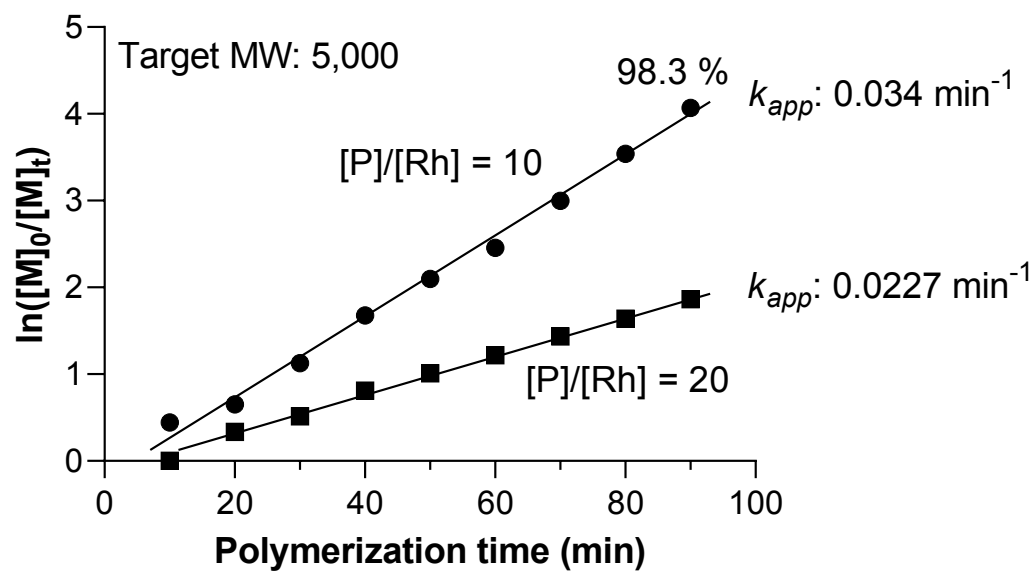

**Figure S22.** Chemical structure and NMR assignments for (3-phenylnaphthalen-1-yl)rhodium(I)(2,5-norbornadiene)(*tris-para*-fluorophenylphosphine)

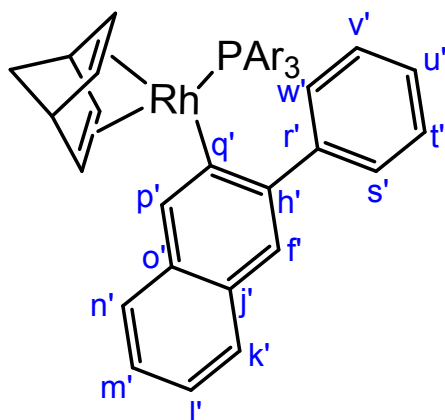

$^1\text{H}$  NMR (600 MHz,  $\text{DCM-}d_2$ )  $\delta$  7.84 – 7.87 (m, 2H,  $\text{H}_{\text{w}'+\text{s}'}$ ), 7.65 (d,  $J = 8.0$  Hz, 1H,  $\text{H}_{\text{k}'}$ ), 7.43 (s, 1H,  $\text{H}_{\text{p}'}$ ), 7.42 (s, 1H,  $\text{H}_{\text{i}'}$ ), 7.42 – 7.39 (m, 4H,  $\text{H}_{\text{v}'+\text{t}'}$ ,  $\text{H}_{\text{u}'}$ ,  $\text{H}_{\text{n}'}$ ), 7.24– 7.23 (m, 1H,  $\text{H}_{\text{m}'}$ ), 7.19 (dd,  $J = 8.7$ , 6.8 Hz, 1H,  $\text{H}_{\text{l}'}$ ), 6.90 - 6.85 (m, 12H,  $\text{H}_{\text{x}'}$ ,  $\text{H}_{\text{y}'}$ ), 4.97 (m, 1H,  $\text{H}_{\text{a}'}$ ), 3.88 (dd,  $J = 4.2$ , 3.4 Hz,  $\text{H}_{\text{f}'}$ ), 3.82 – 3.74 (m, 3H,  $\text{H}_{\text{e}'}$ ,  $\text{H}_{\text{b}'}$ ,  $\text{H}_{\text{d}'}$ ), 3.61 (dd,  $J = 8.3$ , 4.2 Hz,  $\text{H}_{\text{g}'}$ ), 1.52 (m, 1H,  $\text{H}_{\text{c}'}$ ), 1.32 (m, 1H,  $\text{H}_{\text{c}''}$ ).

$^{13}\text{C}$  NMR (151 MHz,  $\text{DCM-}d_2$ )  $\delta$  169.4 (dd,  $J = 33.7$ , 13.1 Hz,  $\text{C}_{\text{q}'}$ ), 163.8 (dd,  $J = 250.1$ , 1.6 Hz, C-F), 147.6 (d,  $J = 1.6$  Hz,  $\text{C}_{\text{r}'}$ ), 147.1 ( $\text{C}_{\text{h}'}$ ), 135.9, (dd,  $J = 14.3$ , 7.9 Hz,  $\text{C}_{\text{x}'}$ ), 133.6 (m,  $\text{C}_{\text{p}'}$ ), 132.5 ( $\text{C}_{\text{o}'}$ ), 131.1 ( $\text{C}_{\text{j}'}$ ), 130.4 (d,  $J = 35.8$  Hz, C-P), 129.4 ( $\text{C}_{\text{v}'+\text{t}'}$ ), 128.1 ( $\text{C}_{\text{k}'}$ ), 127.3 ( $\text{C}_{\text{u}'}$ ), 125.8 ( $\text{C}_{\text{n}'}$ ), 124.9 ( $\text{C}_{\text{m}'}$ ), 124.4 ( $\text{C}_{\text{l}'}$ ), 123.1 ( $\text{C}_{\text{l}''}$ ), 122.7 ( $\text{C}_{\text{w}'+\text{s}'}$ ), 115.4 (dd,  $J = 21.2$ , 10.2 Hz,  $\text{C}_{\text{y}'}$ ), 75.2 (m,  $\text{C}_{\text{g}'}$ ), 74.0 (m,  $\text{C}_{\text{f}'}$ ), 72.3 (m,  $\text{C}_{\text{a}'}$ ), 65.2 (t,  $J = 4.6$  Hz,  $\text{C}_{\text{c}'}$ ), 56.4 (dd,  $J = 19.6$ , 7.4 Hz,  $\text{C}_{\text{e}'}$ ), 51.1 (m,  $\text{C}_{\text{b}'}$ ), 51.0 (d,  $J = 4.0$  Hz,  $\text{C}_{\text{d}'}$ ).

$^{19}\text{F}$  NMR (565 MHz,  $\text{CD}_2\text{Cl}_2$ )  $\delta$  -112.21 (m).

$^{31}\text{P}\{^1\text{H}\}$  NMR (243 MHz,  $\text{CD}_2\text{Cl}_2$ )  $\delta$  23.23 (dq,  $J_{\text{P-Rh}} = 189.8$ ,  $J_{\text{P-F}} = 2.9$  Hz).

$^{103}\text{Rh}$  NMR (19 MHz,  $d_8$ -toluene)  $\delta$  -7682. (544 ppm for Rh metal)

## References

- [1] Rietveld, H. M. 1969. "A Profile Refinement Method for Nuclear and Magnetic Structures." *Journal of Applied Crystallography* 2 (2): 65-71. doi: 10.1107/s0021889869006558.
- [2] Loopstra, B. O., and H. M. Rietveld. 1969. "The Structure of Some Alkaline-Earth Metal Uranates." *Acta Crystallographica B* 25 (4): 787-791. doi: 10.1107/S0567740869002974.
- [3] Coelho, A. A. 2018. "TOPAS and TOPAS-Academic: An Optimization Program Integrating Computer Algebra and Crystallographic Objects Written in C++." *Journal of Applied Crystallography* 51: 210-218. doi: 10.1107/S1600576718000183.

- [4] Rowles, M. R., and C. E. Buckley. 2017. "Aberration Corrections for Non-Bragg-Brentano Diffraction Geometries." *Journal of Applied Crystallography* 50 (1): 240-251. doi: 10.1107/S1600576717000085.
- [5] Dollase, W. A. 1986. "Correction of Intensities for Preferred Orientation in Powder Diffractometry: Application of the March Model." *Journal of Applied Crystallography* 19 (4): 267-272. doi: 10.1107/s0021889886089458.
- [6] Llundell, M.; Casanova, D.; Cirera, J.; Alemany, P.; Alvarez, S. Shape version 2.1 [http://www.ee.ub.edu/index.php?option=com\\_jdownloads&view=viewcategories&Itemid=529](http://www.ee.ub.edu/index.php?option=com_jdownloads&view=viewcategories&Itemid=529).
- [7] Alvarez, S.; Alemany, P.; Casanova, D.; Cirera, J.; Llundell, M.; Avnir, D. *Coord. Chem. Rev.* **2005**, *249*, 1693–1708.
